1 **HAM-ART: An optimised culture-free Hi-C metagenomics pipeline for tracking**  
2 **antimicrobial resistance genes in complex microbial communities**

3 Authors: Lajos Kalmar<sup>1</sup>, Srishti Gupta<sup>1</sup>, Iain R. L. Kean<sup>1</sup>, Xiaoliang Ba<sup>1</sup>, Nazreen  
4 Hadjirin<sup>1</sup>, Elizabeth Lay<sup>1</sup>, Stefan P.W. de Vries<sup>1a</sup>, Michael Bateman<sup>1b</sup>, Harriett  
5 Bartlett<sup>1</sup>, Juan Hernandez-Garcia<sup>1</sup>, Alexander W. Tucker<sup>1</sup>, Olivier Restiff<sup>1</sup>, Mark P  
6 Stevens<sup>2</sup>, James Wood<sup>1</sup>, Duncan J Maskell<sup>1</sup>, Andrew J Grant<sup>§1</sup>, Mark A Holmes<sup>§1</sup>

7 <sup>1</sup> Department of Veterinary Medicine, University of Cambridge, Cambridge CB3 0ES,  
8 United Kingdom.

9 <sup>2</sup> The Roslin Institute, University of Edinburgh, Edinburgh EH25 9RG, United  
10 Kingdom.

11 <sup>3</sup> Department of Medicine, University of Cambridge, Cambridge, United Kingdom

12 <sup>a</sup> Current address: MSD Animal Health, Wim de Körverstraat 35, 5830 AA Boxmeer,  
13 The Netherlands.

14 <sup>b</sup> Current address: Microbiotica Ltd, Biodata Innovation Centre, Wellcome Genome  
15 Campus, Hinxton, Cambridgeshire, UK.

16

17 <sup>§</sup> These authors contributed equally.

18 \* For correspondence: E-mail mah1@cam.ac.uk; Tel. +44-1223-337636. Address:  
19 Department of Veterinary Medicine, University of Cambridge, Madingley Road,  
20 Cambridge, CB3 0ES, United Kingdom.

21

22 USP/Keywords – antimicrobial resistance, metagenomics, culture-independent, Hi-C,  
23 microbiome

24

## 25 **Abstract**

26 Shotgun metagenomics is a powerful tool to identify antimicrobial resistance (AMR)  
27 genes in microbiomes but has the limitation that extrachromosomal DNA, such as  
28 plasmids, cannot be linked with the host bacterial chromosome. Here we present a  
29 laboratory and bioinformatics pipeline HAM-ART (Hi-C Assisted Metagenomics for  
30 Antimicrobial Resistance Tracking) optimised for the generation of metagenome-  
31 assembled genomes including both chromosomal and extrachromosomal AMR  
32 genes. We demonstrate the performance of the pipeline in a study comparing 100 pig  
33 faecal microbiomes from low- and high-antimicrobial use pig farms (organic and  
34 conventional farms). We found significant differences in the distribution of AMR  
35 genes between low- and high-antimicrobial use farms including a plasmid-borne  
36 lincosamide resistance gene exclusive to high-antimicrobial use farms in three  
37 species of *Lactobacilli*.

38

## 39 **Author Summary**

40 Antimicrobial resistance (AMR) is one of the biggest global health threats humanity is  
41 facing. Understanding the emergence and spread of AMR between different bacterial  
42 species is crucial for the development of effective countermeasures. In this paper we  
43 describe a user-friendly, affordable and comprehensive (laboratory and  
44 bioinformatics) workflow that is able to identify, associate and track AMR genes in  
45 bacteria. We demonstrate the efficiency and reliability of the method by comparing 50  
46 faecal microbiomes from pig farms with high-antibiotic use (conventional farms), and  
47 50 faecal microbiomes from pig farms with low-antibiotic use (organic farms). Our  
48 method provides a novel approach to resistance gene tracking, that also leads to the  
49 generation of high quality metagenomic assembled genomes that includes genes on

50 mobile genetic elements, such as plasmids, that would not otherwise be included in

51 these assembled genomes.

52

## 53 Introduction

54 The emergence of resistance to antimicrobials in bacteria can occur by spontaneous  
55 mutation or by the acquisition of mobile genetic elements carrying antimicrobial  
56 resistance (AMR) genes[1] (for example, plasmids *via* natural transformation or  
57 conjugation, or bacteriophages *via* transduction[2]). Over the last decade,  
58 metagenomic studies have revealed that bacterial communities comprising gut flora  
59 or soil microbiota possess a diverse arsenal of AMR genes, termed the resistome[3],  
60 some of which can be transferred between related or unrelated species. A limitation  
61 of next-generation sequencing metagenomics is the identification of species  
62 harbouring a particular AMR gene when that gene is present in extra-chromosomal  
63 DNA. Alternative approaches based on traditional culture of bacteria have provided  
64 direct experimental evidence of plasmid-mediated AMR gene transfer from enteric  
65 pathogens to commensal *Escherichia coli* in rodents[4, 5], chickens[6] and  
66 humans[7]. *Salmonella*-inflicted enteropathy has been shown to elicit parallel blooms  
67 of the pathogen and of resident commensal *E. coli*. These blooms boosted horizontal  
68 gene transfer (HGT) in general, and specifically, the transfer of a conjugative colicin-  
69 plasmid p2 from an introduced *Salmonella enterica* serovar Typhimurium to  
70 commensal *E. coli*[8]. It has been shown that the use of in-feed antimicrobials leads  
71 to a bloom in AMR genes in the bacteriophage metagenome recovered from treated  
72 pigs[9], although it is unclear what the sources or destinations of these genes are.  
73 These observations suggest that HGT between pathogenic and commensal bacteria  
74 is a common occurrence in humans and animals and is likely to contribute to the  
75 persistence and spread of AMR. Moreover, many previous studies on the spread of  
76 AMR from animal sources have focused on AMR of pathogens, with less emphasis

77 on genes within indigenous microbiota that may also pass to humans from animals  
78 (and vice versa) but be difficult to culture.

79

80 To overcome the inability of next-generation metagenomic sequencing to identify  
81 where extra-chromosomal genes of interest reside, a number of chromosome  
82 conformation technologies (such as 3C, Hi-C), originally designed for the study of  
83 three-dimensional genome structure in eukaryotes, have been used[10-12]. These  
84 techniques exploit the ability to create artificial connections between strands of co-  
85 localised DNA by cutting and re-ligating the strands. The techniques differ in their  
86 manner of detection, and the scope of interactions they can probe. Marbouty *et al.*  
87 describe the application of robust statistical methodology to 3C sequence data  
88 (meta3C) derived from a river sediment microbiome[12]. Hi-C, a technical  
89 improvement on the 3C method has been shown to successfully disambiguate  
90 eukaryotes and prokaryotes[11], and to differentiate closely related *E. coli* strains  
91 from microbiomes[10]. Both these techniques offer great potential to define the  
92 dynamics of an introduced AMR gene (both chromosomal and extra-chromosomal),  
93 in particular the nature and frequency of transfer events, including into microbiota  
94 constituents that are not readily detectable by culture in the laboratory. We showcase  
95 the performance of a novel laboratory and bioinformatic pipeline (HAM-ART),  
96 optimised for tracking AMR genes, in a study comparing 100 faecal microbiomes  
97 from UK conventional and organic pig farms.

98

## 99 **Results**

100

101 We developed a laboratory and bioinformatics pipeline (HAM-ART) that: (i)  
102 assembles bacterial genomes with high reliability; (ii) associates mobile genetic  
103 elements to the host genome; and (iii) annotates and associates AMR genes with  
104 high specificity and sensitivity. As HAM-ART is built on traditional metagenomics  
105 sequencing methodology, combined with Hi-C sequencing from the same bacterial  
106 pellet, it could be applied to any complex microbial community. HAM-ART utilises a  
107 widely used sequencing platform, Illumina paired-end sequencing, with standard  
108 library sizes and affordable amounts of sequencing per sample. The bioinformatics  
109 pipeline was designed to be user friendly, and in addition to generating a set of final  
110 metagenomics assembled genomes (MAGs) it outputs results tables reporting  
111 assembly quality, taxonomy and AMR gene association.

112

### 113 **Proof-of-concept study undertaken to validate HAM-ART**

114 The HAM-ART methodology was tested in a study comparing AMR in two groups of  
115 farms; 5 organic (OG1-5) pig farms farming to organic certification standards with low  
116 antibiotic use, and 5 conventional (CV1-5) pig farms with higher antibiotic use. Ten  
117 faecal samples were taken from each farm for metagenomic analysis as described in  
118 the methods section. The organic farms had lower population corrected use (PCU) of  
119 antibiotics (average 3.0 mg/PCU, range 0-9.8 mg/PCU) over the year prior to  
120 sampling compared to conventional farms (average 85.7 mg/PCU, range 3.9-170.1  
121 mg/PCU). Similarly, the number of different classes of antibiotics used on each farm  
122 ranged from 0-4 for organic farms and 4-9 for conventional farms. The results of  
123 metagenomic analyses are described below.

124

## 125 **Generation of MAGs using the HAM-ART pipeline**

126 The pipeline scaffolded *de novo* assemblies using approximately 500k contigs from  
127 each faecal sample, coupled with 0.2-3.4M informative binary connections from the  
128 Hi-C pairs (a Hi-C connection is informative if it connects two different contigs as  
129 opposed to a connection within the same contig). The initial products of HAM-ART  
130 are the consensus clusters (CCs); a collection of contigs that are clustered together  
131 during the network resolution step, solely based on Hi-C contacts, that approximate  
132 to a genome of a constituent bacterial species. The total number of CCs for each  
133 sample varied between 6k-54k, of these we focussed on CCs comprising >250kb  
134 (representing about 1/10<sup>th</sup> of an average prokaryotic genome) for further pipeline  
135 processing. After the splitting and extension of the large CCs (as described in the  
136 methods section) the number of MAGs varied between 5 and 131 (mean: 62,  
137 median: 60) per faecal sample.

138

139 A total of 6184 MAGs were identified from the 100 samples which were distributed  
140 into 1555 clades based on pairwise genetic distance, indicating groups of MAGs  
141 which were likely to represent the same species or genus. The number of members  
142 for each clade varied between 1 and 79 (mean: 3.97, median: 2). All clades were  
143 subjected to clade refinement that resulted in 553 clades with at least one MAG over  
144 500kb in size. After the clade refinement we ended up with 6164 best quality MAGs.

145

## 146 **Validation of a Hi-C MAG with the matching genome generated from culture of** 147 **a single isolate**

148 We noted that *E. coli* were relatively rarely assembled in our samples (4% of  
149 samples). One possible explanation was that *E. coli* were present, but in low  
150 abundance. We investigated this by determining the number of reads in the shotgun  
151 libraries from each sample that mapped to an *E. coli* reference genome (Figure 1).

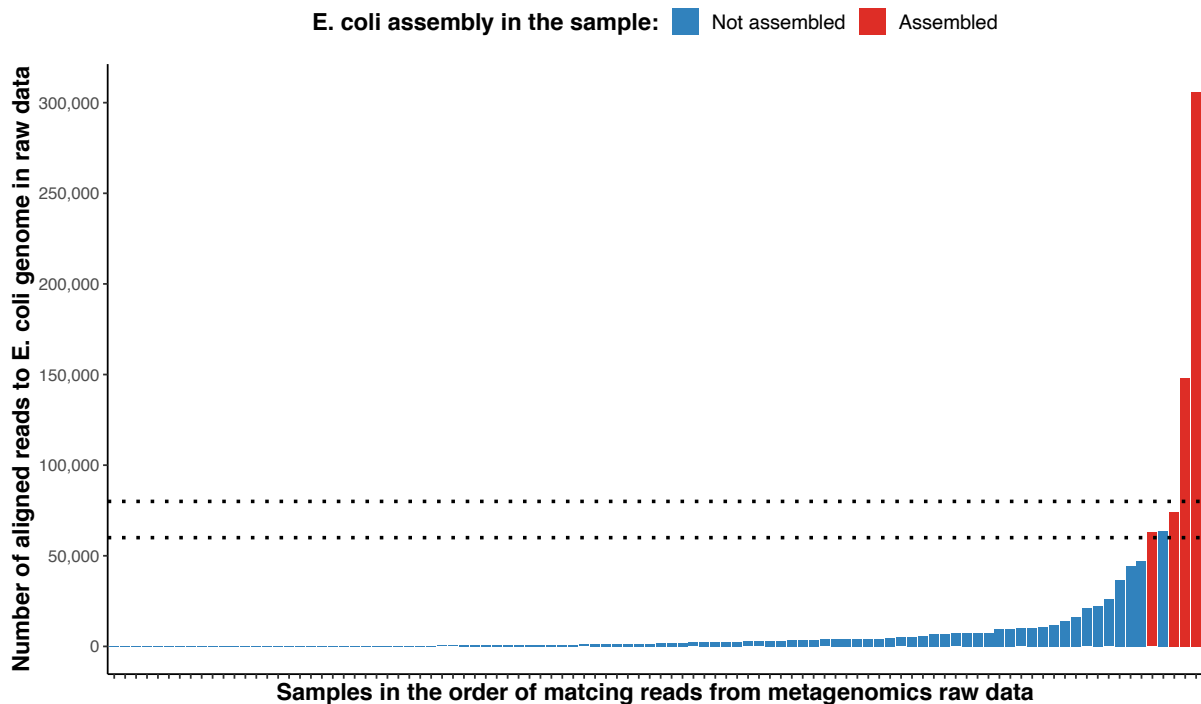

152

153 **Figure 1. Presence of *E. coli* DNA in all samples.**

154 Metagenomic shotgun sequencing raw reads from each faecal sample were aligned  
155 to a reference *E. coli* genome (*Escherichia coli* O157:H7, GCF\_000008865.2) by  
156 bowtie2 (—fast option) and the number of reads "aligned concordantly exactly 1 time"  
157 were extracted from the output log file. Results were plotted in rank order by the  
158 number of aligned reads. In samples plotted as red columns (n=4) *E. coli* MAGs were  
159 successfully assembled using HAM-ART, while those plotted as blue columns were  
160 not. Dotted horizontal lines represent the potential threshold range for successful  
161 assembly of a MAG (60,000-80,000 reads, representing ~0.2% of the total number of  
162 reads for this sample). Repeated analysis using different *E. coli* reference genomes



163 (including an *E. coli* cultured and sequenced from a farm included in this study) gave  
164 similar results.

165

166 This shows that although reads were present in the majority of shotgun libraries, it  
167 was only when there were  $\geq 50k$  *E. coli* reads that a MAG could be created. This  
168 observation suggests that 60-80k reads (representing about 9-12 Mbp),  
169 approximating to 2x coverage of an *E. coli* genome are required in order to generate  
170 a MAG. In this study, which generated approximately 35M reads ( $5.25 \times 10^9$  bp) for  
171 each sample, an individual species would need to represent  $\sim 0.2\%$  of the total  
172 bacterial community in order to generate a MAG.

173

174 We examined the quality of a single Hi-C MAG by performing conventional bacterial  
175 culture and sequencing of an *E. coli* from the same faecal sample (CV5\_05) that  
176 generated the *E. coli* MAG. DNA was extracted and the genome obtained using DNA  
177 sequencing and assembly (Illumina MiSeq and Spades). The MiSeq data yielded a  
178 5.7 MBp assembly (CV05-2\_S2) that was identified as ST20, and harboured 8 AMR  
179 genes (*aadA1*, *aadA2*, *blaCFE-1*, *cmlA1*, *dfrA12*, *mdf(A)*, *sul3* and *tet(34)*). A BLAST  
180 comparison of the MiSeq genome with the Hi-C MAG visualised using BRIG is shown  
181 in Figure 2.

182

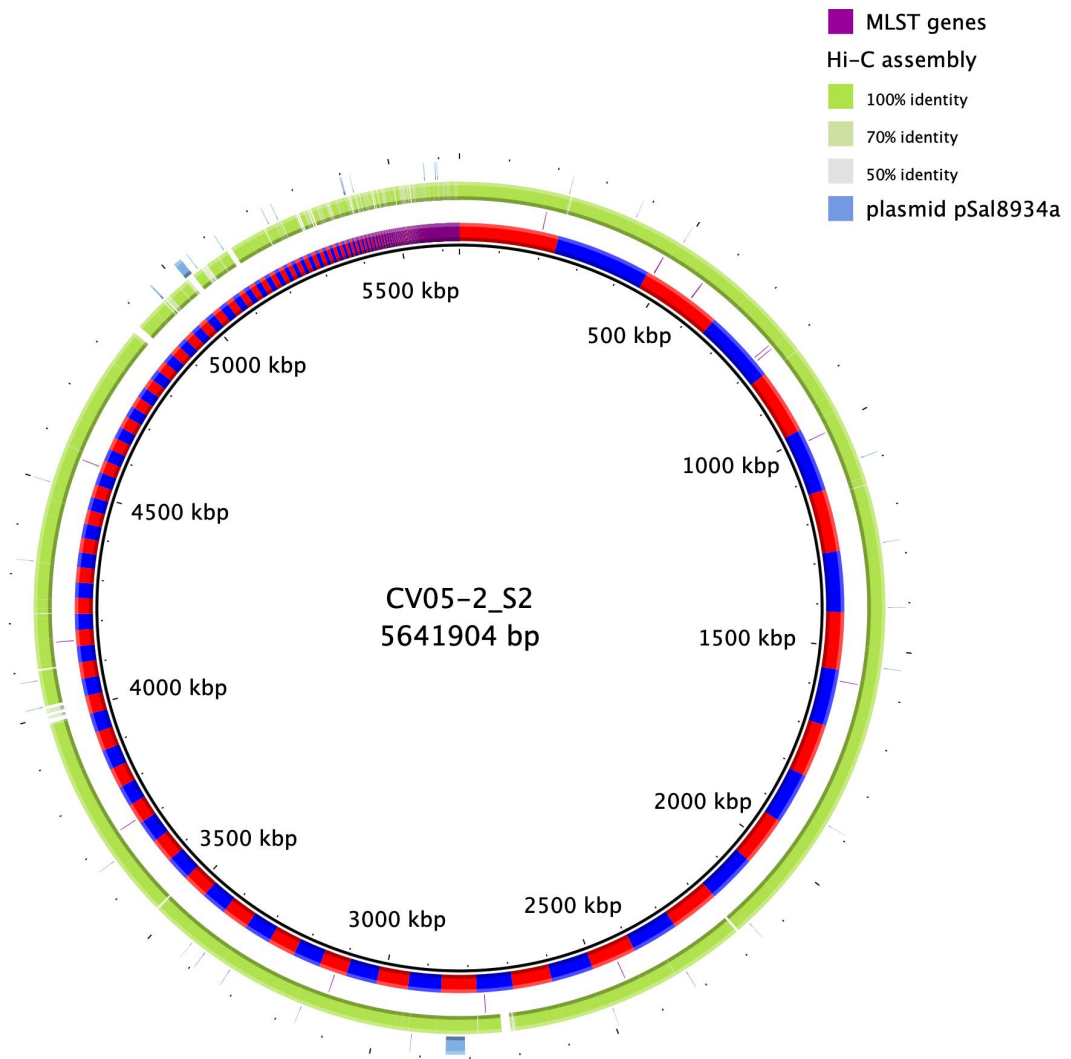

183

184 **Figure 2. BLAST comparison of an *E. coli* MAG with a corresponding *E. coli***  
185 **assembly obtained using culture, followed by Illumina MiSeq sequencing and**  
186 **assembly.**

187 The innermost ring shows the MiSeq assembly with contig boundaries indicated by  
188 alternate red and blue colouring. The position of the MLST genes (both MLST  
189 schemes 1 and 2) are indicated in the second ring. The matching Hi-C MAG's identity  
190 levels are shown in the third ring. The presence of a possible plasmid is illustrated in

191 pale blue in the outermost ring. This ring contains the comparison results for a S.  
192 Typhimurium plasmid pSal8934a (NCBI accession number JF274993). This plasmid  
193 has 99.6% identity and a query coverage of 79% compared to one of the MiSeq  
194 assembly contigs (and also to the matching MAG). This plasmid contains the *aadA1*,  
195 *aadA2*, *cmlA1*, *dfrA12* and *sul3* AMR genes.

196

197

198

### 199 **Taxa composition of the pig microbiomes from conventional and organic farms**

200 The distribution of taxa between CV and OG farms (Figure 3 and Supplementary  
201 Figure S1) were broadly similar with the possible exception of OG3. On all farms the  
202 diversity included common intestinal bacterial orders, dominated by *Bacteroidales*,  
203 *Lachnospirales*, *Lactobacillales*, *Oscillospirales*, which is consistent with previous pig  
204 faecal microbiome studies[9, 13-15]. The relative paucity of *Enterobacteriaceae* and  
205 the presence of a substantial number of treponemes appear to be characteristic of  
206 the pig faecal microbiome[16, 17].

207

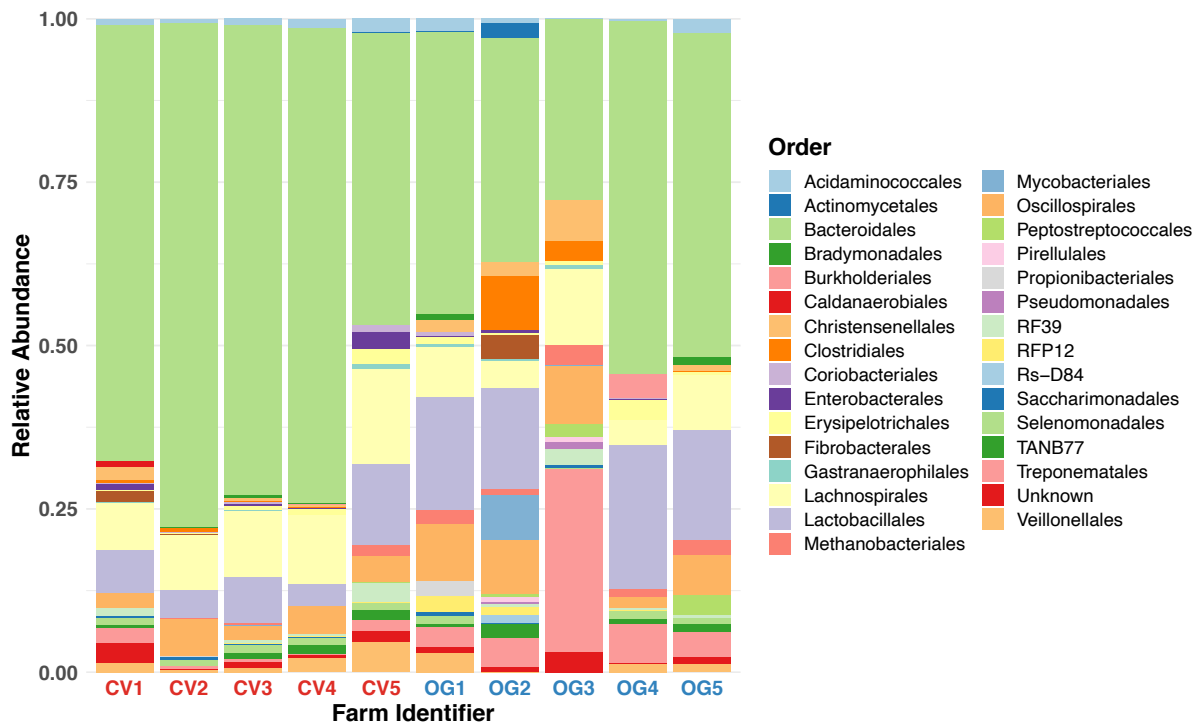

208

209 **Figure 3. Order-level relative composition of the pig faecal microbiota in the**  
210 **study farms.**

211 The average relative abundance of different orders identified by GTDB-tk in the final  
212 assemblies were calculated from 10 samples in each of the 10 farms included in the  
213 study. Plots of different taxonomic levels are shown in Supplementary Figure S1.

214

215

### 216 **AMR gene distribution in faecal samples from CV and OG farms**

217 We identified 66 different AMR genes (in 36 resistance gene groups, as described in  
218 methods – analysis of assembly data) using the ResFinder AMR gene database  
219 within our final 6164 MAGs (Supplementary Table S2). A comparison of the  
220 distribution of AMR genes (Figure 4A) indicates that a greater diversity of AMR genes  
221 were found in CV farms compared to OG farms.

222

223

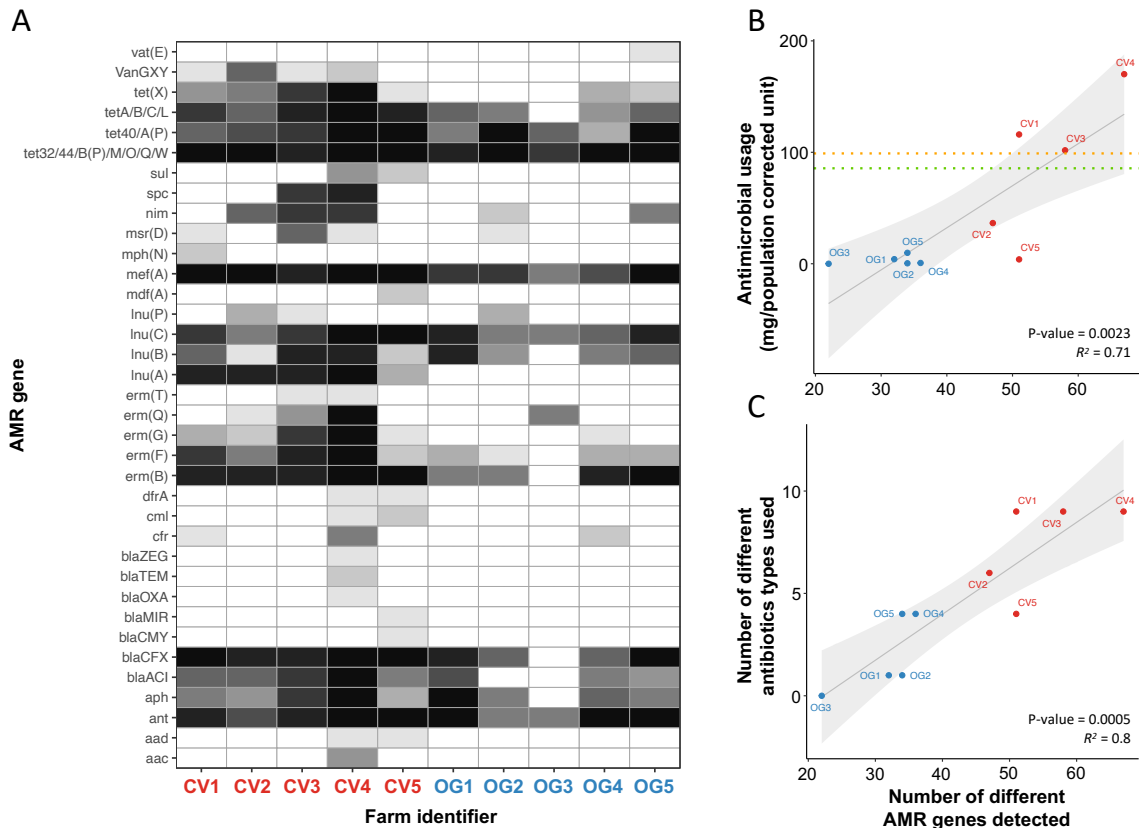

224

225 **Figure 4. AMR gene distribution in faecal samples from CV and OG farms and**  
 226 **the correlation with levels of antimicrobial used.**

227 Panel A: The heatmap shows the number of samples from which MAGs were  
 228 generated containing different AMR genes, with the intensity of shading ranging from  
 229 0/10 samples (white) to 10/10 samples (black). Conventional (CV1 to 5) and organic  
 230 (OG1 to 5) are labelled using red and blue text respectively. Panel B: A scatter plot  
 231 of the amounts of antimicrobial used (mg/population corrected unit (PCU)) in the year  
 232 prior to sampling, against the number of different AMR genes detected for each farm.  
 233 The orange line indicates the 2020 target set by the Responsible Use of Medicines in  
 234 Agriculture Alliance for antibiotic use (99 mg/PCU), and the green line represents the  
 235 average calculated from the 5 CV farms in our study (85.7 mg/PCU). Panel C: A  
 236 scatter plot showing the number of different antimicrobial types used in the year prior

237 to sampling, against the number of different AMR genes found. Spearman correlation  
238 coefficients and significance values were calculated by fitting a linear regression  
239 model on the data points in R (line of best fit and 95% confidence intervals are  
240 shaded in grey).

241

242 Genes that encode proteins potentially able to confer resistance to  $\beta$ -lactams and  
243 chloramphenicol were present at greater numbers in samples from CV farms. A  
244 number of genes were present solely in samples from CV farms (*aac*, *aad*, *blaCMY*,  
245 *blaMIR*, *blaOXA*, *blaTEM*, *blaZEG*, *cml*, *dfrA*, *erm(T)*, *Inu(A)*, *mdf(A)*, *mph(N)*, *spc*,  
246 *sul*, *van(GXY)*), whereas the gene *vat(E)* was found solely in one OG farm.

247 Comparing the number of different AMR genes found in the faecal microbiomes to  
248 the antimicrobial use on each farm (using PCU, and the number of different  
249 antimicrobials used), we observed statistically significant correlations (Figure 4  
250 panels B and C). The correlation of AMR genes with PCU had an R squared value of  
251 71% and P value of 0.0023; the correlation of AMR genes with the number of  
252 different antimicrobials used had an R squared value of 80% and P value of 0.0005.

253

#### 254 **Association of *Inu(A)* gene harbouring plasmid to *Lactobacilli* species**

255 An analysis of the distribution of resistance genes among their host MAGs revealed  
256 that the lincosamide resistance gene, *Inu(A)*, was found in three clades  
257 corresponding to *Lactobacillus amylovorus*, *Lactobacillus johnsonii*, and *Lactobacillus*  
258 *reuteri*. All three clades were present in the majority of samples from both OG and  
259 CV farms, however the *Inu(A)* gene was only present in CV farms (Figure 4 panel A  
260 and Figure 5).

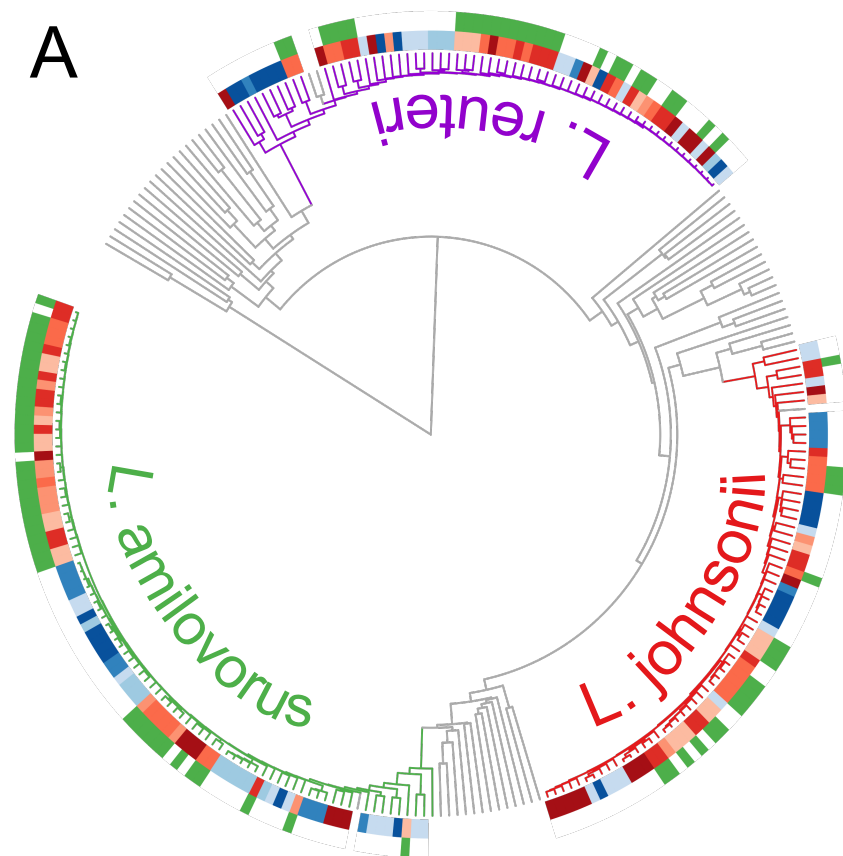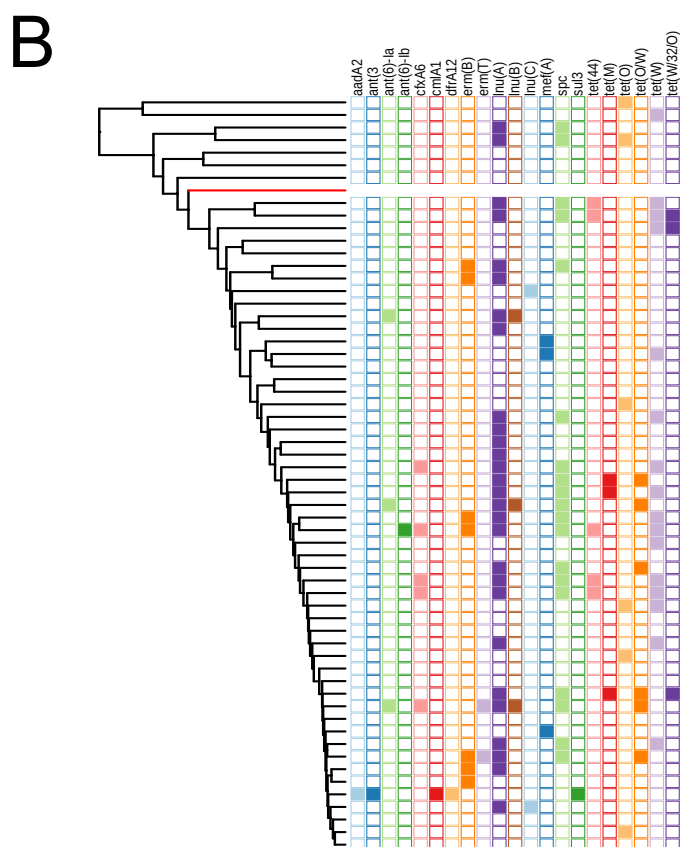

261

262

263

264 **Figure 5. Association of different AMR genes to *Lactobacilli* species.**

265 Panel A: A distance tree based on sequence comparisons of *L. amylovorus*, *L.*  
266 *johnsonii* and *L. reuteri* assemblies found in farms (coloured branches) together with  
267 genomes of the corresponding *Lactobacilli* species (grey branches inside clades) and  
268 other known *Lactobacilli* species (grey branches outside the clades) from the NCBI  
269 RefSeq collection (<https://www.ncbi.nlm.nih.gov/refseq/>). The blocks of colour  
270 adjacent to the branch-tips indicate the farm type and number (light to dark red: CV1  
271 to 5; light to dark blue: OG1 to 5). The outer circle shows the presence of the *Inu(A)*  
272 gene within the MAG (green: present, none: absent). Panel B: A distance tree based  
273 on sequence comparisons of all *L. reuteri* MAGs found in the farm samples showing  
274 the presence/absence (filled/empty square) of all the AMR genes found in this clade  
275 (black branches: MAGs from farm samples, red branch: *L. reuteri* reference genome  
276 from NCBI RefSeq collection).

277

278

279 The *Inu(A)* gene was found in all of the CV farms and did not appear to be restricted  
280 to a single lineage or species on individual farms. The number of *L. amylovorus*, *L.*  
281 *johnsonii* and *L. reuteri* MAGs obtained from CV farms were 47, 36 and 42  
282 respectively, and from OG farms were 36, 23, and 25. Examination of the contigs  
283 which harboured the *Inu(A)* gene indicated that an identical 5.6 kb sequence was  
284 present in 27/34 *Inu(A)* positive *L. amylovorus*, 17/28 *Inu(A)* positive *L. johnsonii* and  
285 18/18 *Inu(A)* positive *L. reuteri* MAGs. The sequence was often present in a single  
286 contig of approximately the same length but with different sequencing origins



287 suggesting that it was present as a plasmid. In the *Inu(A)* positive lactobacilli MAGs  
288 that did not appear to contain the entire sequence, the majority (15/18) had a short  
289 contig that was identical to part of the putative plasmid sequence. A BLAST search of  
290 the NCBI database showed that this sequence had 99.8% identity with an 884bp  
291 section of a plasmid from a *L. johnsonii* (CP021704) and had 83.2% identity with a  
292 1399bp section of a plasmid from a *L. amylovorus* (CP002560).

293

## 294 **Discussion**

295 Conventional shotgun metagenomics sequencing can generate lists of AMR genes  
296 and lists of species contained in a microbiome but is not capable of consistently  
297 identifying which bacteria carry which plasmid. The application of Hi-C metagenomics  
298 in this study demonstrates that this technique is able to place AMR genes carried on  
299 plasmids with their host genomes. The HAM-ART pipeline was tested using a  
300 challenging experimental design involving 100 faeces samples from 10 different  
301 farms. The results from this study show that it is possible to obtain high resolution,  
302 good quality results by performing relatively modest amounts of sequencing on  
303 samples of varying quality. While there are other pipelines capable of analysing  
304 combined chromosome-capture based assembly and AMR gene association[18-23],  
305 HAM-ART is the first method that is designed to cope with large sample numbers,  
306 using the most common Illumina based sequencing platform and delivering results  
307 from affordable amounts of sequencing depth.

308

309 Unsurprisingly this study shows that farms with lower use of antimicrobials (typically  
310 OG farms, who are members of an assurance scheme that strongly regulates the  
311 amount of antimicrobials to which the animals are exposed) are associated with

312 smaller numbers and lower diversity of AMR genes, as has been shown in previous  
313 studies[24, 25]. The statistically significant correlation between the amount of  
314 antimicrobial used, and the number of different AMR genes detected for each farm  
315 clearly demonstrates this relationship and supports this as a driver of AMR. The use  
316 of Hi-C metagenomics allows a deeper investigation of the relationship between the  
317 use of antimicrobials, AMR genes and the bacteria that harbour those genes.

318

319 Of note from this study, is the demonstration of a particular AMR gene, *Inu(A)* that  
320 was only found in samples from CV farms. Within CV farms we found this gene to be  
321 harboured in three different species of *Lactobacillus*. All three species of  
322 *Lactobacillus* (*L. amylovorus*, *L. Johnsonii* and *L. reuteri*) were also found in OG  
323 farms and the distance tree would suggest that similar levels of diversity are present  
324 for each species, whether present on an OG or a CV farm. There is good evidence  
325 that the *Inu(A)* gene is carried on the same plasmid for all three *Lactobacillus*  
326 species, suggesting that any selection pressure selects for the mobile plasmid rather  
327 than the host bacteria. The small number of farms, and potential confounders such  
328 as geographical bias may have influenced the observed distribution and so this result  
329 needs to be confirmed. Nonetheless, the detection of AMR genes, carried on a  
330 plasmid, in multiple species without culture could only be performed using  
331 chromosome conformation metagenomics techniques such as Hi-C.

332

333 A direct assessment of the quality of a Hi-C MAG was afforded by the parallel culture  
334 and sequencing of an *E. coli* isolate from the same sample. The homologous Hi-C  
335 MAG contained the same MLST and AMR genes as the assembly obtained from

336 conventional culture and sequencing, including AMR genes likely present on a  
337 plasmid.

338  
339 Taxonomic identification of shotgun metagenome assemblies is widely recognised as  
340 problematic. We used GTDB-Tk[26], a method based on a significantly larger  
341 genome set than previous algorithms (*e.g.* CheckM) but were still not able to resolve  
342 the taxonomy of many large clades of interest beyond the class level. The  
343 chromosome conformation methodology has the potential to generate better quality  
344 MAGs by generating links between contigs to improve binning or scaffolding. Greater  
345 use of Hi-C metagenomics will enable the production of better quality MAGs for rare  
346 or difficult to culture bacteria. Use of the HAM-ART pipeline should also give a lower  
347 likelihood of generating mixed or contaminated MAGs.

348  
349 We performed further investigations to confirm that the use of pooled Hi-C libraries (2  
350 per farm) did not lead to artefactual assembly of MAGs from all 5 of the shotgun  
351 libraries that used the same pooled Hi-C library to identify connection pairs. The use  
352 of pooled Hi-C libraries reduced costs considerably in terms of staff time and finance.  
353 It is clear from an examination of the distribution of taxa among the samples that  
354 there are numerous examples of clades/taxa which we only found in a single sample  
355 from a set of 5 sharing the same Hi-C library. Out of our total of 6164 MAGs we  
356 would have expected equal distribution between OG and CV farms but only 2176  
357 came from OG farms and 3988 from CV farms. While this may have occurred due to  
358 a lower species diversity present in the OG farms, it is likely to be a consequence of  
359 the larger number of lower yielding Hi-C libraries generated from the OG farms.

360

361 The sensitivity threshold for the creation of a MAG from a species contained within a  
362 microbiome using Hi-C metagenomic sequencing will be affected by three things.  
363 Firstly, the size of the genome of the species of interest (which is likely to be a minor  
364 effect); secondly, the amount of sequencing undertaken; and thirdly, the relative  
365 abundance of the species of interest which is probably the most significant influence.  
366 The relative abundance of a particular bacterial species may limit the power of the  
367 technique when a species of interest may only be present in low numbers. It is likely  
368 that there will be some species harbouring AMR genes of interest that are present  
369 below a threshold of 1:500 (that we estimate as our theoretical threshold from the *E.*  
370 *coli* content comparison). We used ARIBA to independently assemble AMR genes  
371 from our short-read sequencing data and did not find any significant discrepancy  
372 between the genes assembled with this method and those found in the MAGs.  
373 Indicating that where a gene can be assembled, the Hi-C technique is able to place it  
374 in a MAG.

375  
376 In summary, we successfully established a laboratory and bioinformatics Hi-C  
377 metagenomics pipeline HAM-ART and used it to address a research question using a  
378 set of 100 separate samples. We optimised HAM-ART to deal with mixed MAGs, to  
379 exploit reference MAGs from within the experimental data set, and to assign AMR  
380 genes to the correct MAGs with maximum sensitivity and specificity. While the  
381 pipeline focusses on AMR gene tracking for this study, it could be used on other  
382 dedicated gene sets (for example a library of virulence-associated genes) to  
383 associate these to the host genome. Moreover, it provides a cost-effective strategy to  
384 assess the dynamics of AMR transfer longitudinally following treatment with specific  
385 antibiotics or doses, and following experimental infection. We validated our assembly

386 quality and AMR gene associations by comparing a MAG to one obtained from a  
387 cultured *E. coli* from the same faecal sample. We have also shown that the method is  
388 robust and affordable when processing large number of samples and provide data  
389 illustrating the operational characteristics of both the wet laboratory and bioinformatic  
390 protocols involved.

## 391 **Methods**

392 **Study population, sampling and data collection.** Ethical approval for the sampling  
393 and the collection of data was obtained (CR295; University of Cambridge,  
394 Department of Veterinary Medicine). All of the pig farms sampled were located in  
395 southern England and were selected arbitrarily from a list of volunteering farms. The  
396 farm descriptors are shown in Supplementary Table S1. We sampled five CV pig  
397 farms and five OG pig farms that were members of the Soil Association farm  
398 assurance scheme (which stipulates strict controls on the use of antimicrobials). Ten  
399 fresh faecal droppings per farm were collected from different groups of fattening pigs  
400 aged between 4-20 weeks, transported on ice/cold packs and stored at  $-80^{\circ}\text{C}$  within  
401 6 h of collection. Information on the use of antimicrobials in the one-year period prior  
402 to sampling was collected by questionnaire informed by the farm records. The annual  
403 use of antimicrobials in mg/number of Population Correction Unit (PCU) was  
404 calculated by dividing the total amount of each antibiotic used over the course of a  
405 year by the total average liveweight of the animals on the farm taking into account  
406 the numbers of pigs and their ages.

407  
408 **Enrichment of the microbial fraction from pig faeces.** The microbial fraction from  
409 a faecal sample was enriched using an adaptation of a previously described method  
410 by Ikeda *et al.*[27]. Prior to the enrichment process, 0.5 g of faeces was re-  
411 suspended in 9 ml of saline and homogenised for 2 min in a Stomacher 80 (Seward)  
412 at high power. Debris was removed from the homogenised sample by centrifugation  
413 at 500 g for 1 min. The supernatant was then transferred on top of 3.5 ml of sterile  
414 80% (w/v) Histodenz (Sigma) and centrifuged in a Beckman ultracentrifuge using a  
415 JLA 16.250 rotor at 10,000 g for 40 min at  $4^{\circ}\text{C}$ . After centrifugation, the layer on top

416 of the insoluble debris was recovered into a new 15 ml tube (Falcon) and centrifuged  
417 at 500 g for 1 min to remove debris. The supernatant was moved to a new 15 ml tube  
418 (Falcon) and centrifuged at 10,000 g for 20 min at 4°C. The bacterial pellet was  
419 washed in 10 ml of TE buffer (Merck) and used for the generation of Hi-C libraries.

420

421 **Fixation of bacterial cells with formaldehyde.** The isolated bacterial fractions from  
422 faeces (described in the previous section) were mixed with 2.5% (v/v) formaldehyde  
423 (16% methanol-free formaldehyde, Sigma) and incubated at room temperature (RT)  
424 for 30 min followed by 30 min at 4°C to facilitate cross-linking of DNA within each  
425 bacterial cell. Formaldehyde was quenched with 0.25 M glycine (Merck) for 5 min at  
426 RT followed by 15 min at 4°C. Fixed cells were collected by centrifugation (10 mins,  
427 10000 rpm, 4°C) and stored at -80°C until further use. We pooled bacterial pellets of  
428 five samples from the same farm to generate Hi-C libraries, thereby obtaining two Hi-  
429 C libraries per farm.

430

431 **Generation of Hi-C libraries.** The method for the construction of bacterial Hi-C  
432 libraries was adapted from Burton *et al.*[11]. Briefly, DNA from the fixed cells was  
433 isolated by lysing bacterial pellets in lysozyme (Illumina) followed by mechanical  
434 disruption using a Precellys Evolution bead beater (Bertin Technologies, France).  
435 Isolated chromatin was split into four aliquots and digested for 3 h at 37°C using  
436 *HpyCH4IV* restriction enzyme (New England Biolabs). Restriction fragment  
437 overhangs were filled with biotinylated dCTP (Thermo Scientific) and Klenow (New  
438 England Biolabs) as described by van Berkum *et al.*[28]. Biotin labelled digested  
439 chromatin was diluted in 8 ml of ligation buffer (New England Biolabs, T4 ligase kit)  
440 and proximity ligation was performed at 16°C for 4 h. De-cross-linking was performed

441 at 65°C overnight (o/n) with 250 µg/ml proteinase K (QIAGEN). DNA was recovered  
442 upon precipitation with 50% (v/v) isopropanol (Fischer Scientific) in the presence of  
443 5% (v/v) 3M sodium acetate (pH 5.2) (Merck) and then treated with RNase A  
444 (QIAGEN). Finally, DNA from each sample was recovered in 50 µl TE buffer (Merck)  
445 upon phenol-chloroform (Merck) extraction. For Hi-C libraries, biotin from the un-  
446 ligated DNA ends was removed by T4 Polymerase (New England Biolabs). DNA was  
447 purified using the Monarch PCR and DNA Clean-up Kit (New England Biolabs).

448  
449 **Generation of Hi-C Illumina sequencing libraries.** Illumina sequencing libraries  
450 were constructed from purified DNA obtained after Hi-C library preparations using  
451 NEBNext Ultra II DNA library prep kit (New England Biolabs). Approximately, 100 ng  
452 of DNA of Hi-C libraries was sheared to 400 bp using a Covaris M220 (duty cycle  
453 20%, 200 cycles per burst, peak incident power 50W, treatment time 40 s; Covaris  
454 Ltd., UK). Ends of the sheared fragments were repaired, adaptors ligated, and  
455 samples were indexed as described in manufacturer's protocols. Before the indexing,  
456 we performed semi-quantitative PCR to determine the optimal cycle range for  
457 indexing.

458  
459 **Metagenome sequencing.** Metagenomic DNA was isolated from 0.25 g of faeces  
460 using Precellys Soil DNA kit (Bertin Technologies, France). Libraries for shotgun  
461 metagenome Illumina sequencing were prepared using the NEBNext Ultra II DNA  
462 library prep kit (New England Biolabs) upon shearing 250 ng of metagenomic DNA to  
463 400 bp with Covaris M220 (duty cycle 20%, 200 cycles per burst, peak incident  
464 power 50W, treatment time 50 s; Covaris Ltd., UK).

465



466 **Illumina sequencing of shotgun metagenomic and Hi-C libraries.** Following DNA  
467 library preparation, the library size was determined with a Bioanalyzer 2100 (Agilent),  
468 quantified using the Qubit dsDNA BR kit (Thermo Scientific), pooled appropriately,  
469 and analysed with the NEBNext library quant kit (New England Biolabs). The pooled  
470 library was subjected to 150 bp paired-end sequencing on the HiSeq 4000 platform  
471 (Genomics core facility, Li Ka Shing Centre, University of Cambridge – as 4 shotgun  
472 libraries per Illumina HiSeq lane, 1 Hi-C library per Illumina HiSeq lane).

473  
474 **Bioinformatics pipeline – pre-processing and de-novo assembly.** Next  
475 generation sequencing raw data files were pre-processed in different ways according  
476 to the sequencing library they were derived from. Shotgun metagenomics  
477 sequencing data passed through two filtering / quality control steps: (i) optical and  
478 PCR duplication removal by using clumpify.sh script from the BBMap software  
479 package (<https://sourceforge.net/projects/bbmap/>); (ii) removal of read pairs matching  
480 with the host genome using Bowtie2[29] and the pig reference genome (Sscrofa11.1:  
481 GCA\_000003025.6). As we performed bacterial cell enrichment during the Hi-C  
482 library preparation, we only filtered the raw reads for optical and PCR duplications by  
483 using the above-mentioned method. Both raw datasets passed through a merging  
484 step, where overlapping (at least 30 nucleotide) reads were merged to one single  
485 read, using FLASH software[30]. After merging, metagenomic sequencing reads  
486 were passed to the assembly step as paired-end (un-merged) or single-end (merged)  
487 reads. All Hi-C sequencing reads were processed further by a Perl script that  
488 detected the modified restriction site (in our case A|CGT is modified to ACGCGT)  
489 and re-fragmented reads accordingly. This step ensured that hybrid DNA fragments  
490 were not used in the assembly step. The pre-processed sequence reads from both

491 libraries were used in *de novo* metagenomic assembly to build up contigs from  
492 overlapping reads by using metaSPAdes[31]. To avoid the introduction of any bias  
493 towards known species, we did not use any reference sequence-based assembly  
494 method.

495

496 **Bioinformatics pipeline – post-processing.** Re-fragmented and unmerged Hi-C  
497 reads were realigned to the contigs from the assembly by Bowtie2[29] to extract the  
498 binary contact information between DNA fragments. The complete list of binary  
499 contacts was then transformed to a weighted list and fed into the Louvain algorithm  
500 (<https://sourceforge.net/projects/louvain/>) for 100 iterations of network resolution.  
501 Contigs that were clustered together in all 100 iterations were put in the same  
502 consensus cluster (CC).

503

504 This network resolution method means that a contig can only be assigned to one  
505 cluster which may have two unwanted consequences. Firstly, contigs from two or  
506 more closely related species may be assigned to the same CC due to sequence  
507 homology. The separation of mixed CCs is first addressed using a coverage  
508 distribution-based separation algorithm for each CC which splits the CC if the  
509 distribution of sequencing coverage was clearly multimodal. The second  
510 consequence is that contigs that are shared may not be correctly assigned to all of  
511 the CCs that should contain copies (*e.g.* a plasmid possessed by two or more  
512 species as a result of HGT). An iterative CC extension step was built into the pipeline  
513 at this point to extend clusters based on the Hi-C inter-contig contacts and cautiously  
514 identify contigs that should be allocated to multiple CCs.

515

516 Final MAGs were annotated for AMR genes using BLAST[32] using the ResFinder  
517 database[33] and taxonomically profiled by GTDB-Tk[26]. AMR genes were also  
518 identified from the raw metagenomics sequence reads using ARIBA[34] and  
519 compared to the MAG assembly AMR associations to identify the absence of any  
520 AMR genes in the final MAGs.

521  
522 A further clade refinement step in the pipeline exploits the availability of data from  
523 multiple samples of the same type (e.g. the other faeces samples from the same  
524 study).

525  
526 **Bioinformatics pipeline – clade refinement.** This part of the pipeline undertakes a  
527 new scaffolding iteration using reference genomes from the previous scaffolding  
528 attempt. The main steps of this process were: (i) performing pairwise sequence  
529 comparisons between all MAGs (from all samples) by using MASH[35, 36]; (ii) using  
530 the UPGMA (unweighted pair group method with arithmetic mean) algorithm on  
531 pairwise distance data to form clades of closely related MAGs (distance threshold in  
532 UPGMA for clade definition: 0.12); (iii) select an exemplar MAG in the clade to use as  
533 a within-clade reference sequence; (iv) use the exemplar reference sequence to  
534 extract highly similar contigs (using BLAST[32]) from the original full contig collection  
535 of the *de novo* assembly for each of the other samples; (v) use Hi-C contact data to  
536 refine the collection of contigs extracted by reference search and exclude contigs  
537 with no Hi-C contact to other contigs within the MAG; (vi) use Hi-C contacts to extend  
538 MAGs with AMR gene containing contigs; (vii) perform a final extension on the MAGs  
539 (with the same method as used in the post-processing). We found that the most  
540 crucial step during the refinement was the selection of the clade exemplar in the

541 clade that potentially had the most complete genome with minimal contamination.  
542 After several attempts of using physical parameters (e.g. using the largest, the  
543 median size, the most unimodal coverage distribution) we found that mixed MAGs  
544 (mixture of more than one closely related genomes) were also selected as exemplars  
545 many times. Therefore, instead of using the above mentioned parameters alone or in  
546 combination, we used the core single copy gene set of the GTDB-Tk[26] by running  
547 the toolkit “identify” module and looking for: (i) the MAG with the highest number of  
548 unique single copy genes (maximum completeness); and (ii) the MAG with the  
549 highest unique single copy genes / multiple single copy genes ratio (minimum  
550 contamination).

551  
552 **Bioinformatics pipeline - analysis of MAG sequence data:** A set of custom scripts  
553 were written to perform AMR gene searches, undertake taxonomic identification,  
554 identify closely related reference genomes, and generate paired distance trees for  
555 the clades. AMR gene searching was performed using a local installation of  
556 BLAST[32] using the ResFinder database[33]. AMR genes were defined as being  
557 present where >60% of the length of the target gene was present with an identity of  
558 >80%. For AMR gene grouped analysis: (i) the aminoglycoside modifying enzymes  
559 were grouped by the modifying group which was attached (aminoglycoside  
560 nucleotidyl transferases were grouped together, as were phosphotransferases,  
561 acetyltransferases and adenytransferases); (ii) due to increasing interest in the role  
562 ESBL plays in disease, beta-lactamases were grouped by homology; (iii) gene  
563 families which were represented by different alleles were considered one gene type;  
564 (iv) the dihydrofolate reductase genes *dfrA12* and *dfrA14* are considered as *dfrA*; (v)  
565 nitrofurantonin reducing genes were grouped together into the *nim* group; (vi)

566 sulfonamide resistance genes *sul1-sul3* were grouped as *sul*; (vii) tetracycline  
567 resistance genes were grouped by function and sequence homology, with  
568 homologous genes combined into groups; and (viii) vancomycin resistance clusters  
569 *vanGXY* and *vanG2XY* were considered as one group. Taxonomic identification and  
570 the search for closely related reference genomes was performed using GTDB-Tk[26].  
571 Pairwise distances between clade member MAGs and other genomes were  
572 determined using MASH[35, 36], and the distance tree generated by the UPGMA  
573 algorithm. The Newick formatted tree files were annotated using iTOL[37]. Summary  
574 text files were automatically created for all clade members with taxonomic  
575 identifications and AMR gene associations. A summarised output with all MAGs and  
576 AMR gene associations was generated together with a filtered version where  
577 incomplete MAGs (filtered out by the default settings of GTDB-Tk[26]) were  
578 excluded. For a detailed workflow of the bioinformatics pipeline see Supplementary  
579 Figure S2.

580  
581 **Bioinformatics pipeline - Quality control:** We created custom scripts to extract  
582 quality information from almost every step during the pipeline: (i) ratio of duplicated  
583 raw reads (detecting low concentration libraries); (ii) ratio of merged raw read pairs  
584 (verifying library sizes); (iii) ratio of merged Hi-C reads without detectable ligation site  
585 (pointing to problems with Hi-C library preparation); (iv) number of contigs in the *de*  
586 *novo* assembly; (v) Hi-C reads alignment ratio; (vi) number and ratio of informative  
587 Hi-C read pairs (a Hi-C read pair is informative if it connects two different contigs);  
588 (vii) average modularity during the Louvain network resolution; (viii) single copy gene  
589 ratios during clade refinement; (ix) final CheckM-like MAG parameters analysed by  
590 GTDB-tk[26] (MAG size, contig number, N50, average coverage, GC-content,

591 taxonomy, completeness). We performed traditional metagenomics assembly on a  
592 set (n=11) of randomly selected samples using the MetaWRAP pipeline (default  
593 threshold setting, MetaSpades assembler) [38] and compared the result with the  
594 HAM-ART output. While we generally got a higher number of final MAGs from the  
595 HAM-ART pipeline (average number of final MAGs 29.5 vs 50.1), due to a few  
596 potentially lower quality Hi-C libraries, we had higher variation among the HAM-ART  
597 final sets (standard deviation of the mean 13.9 vs 41.2).

598

599 **Statistical analysis.** Simple linear regressions were performed using R (ggplot2 and  
600 ggpmisc packages). Spearman's method was used to determine the P value and  
601 correlation coefficient.

602

603 **Sequencing data.** Chromosome conformation capture and metagenome sequencing  
604 data have been deposited in the European Nucleotide Archive  
605 (<http://www.ebi.ac.uk/ena>) and are available *via* study accession number [To be  
606 deposited before final submission].

607

608

609 **Acknowledgements**

610 This work was funded by Medical Research Council grant MR/N002660/1.

611

612 **Author contributions**

613 SPWdeV, AWT, MPS, JLNW, DJM, AJG, and MAH designed experiments.

614 LK, SG, IRLK, AJG, and MAH wrote the manuscript.

615 LK, SG, IRLK, SPWdeV, MB, OR, AWT, MPS, JLNW, DJM, AJG, and MAH edited  
616 the manuscript.

617 SG, IRLK, XB, NH, EL, SPWdeV, HB, and JH-G performed the experimental work  
618 and collected field data.

619 LK designed the HAM-ART pipeline; IRLK, MB, and MAH performed the  
620 bioinformatic analyses.

621 LK, SG, IRLK, SPWdeV, OR, AJG, and MAH analysed results.

622

623 **Competing financial interest**

624 The authors declare no competing financial interests.

625

626

627 **Supplemental information**

628

629 **Table S1** | Characteristics of the farms used in the study. The conventional or high-  
630 antimicrobial use farms are labelled CV\_1 to 5 and the organic, or low antimicrobial  
631 use farms are labelled OG\_1 to 5.

632

633 **Table S2** | Complete list of MAGs and their AMR gene associations from 100 pig  
634 faecal samples. Columns in the tab-separated table are: Farm and sample  
635 identification (*e.g.* CV3\_2 stands for sample 2 from conventional farm 3); Type of the  
636 farm (organic / conventional); Clade identifier; Size of the assembly (in kilobases);  
637 Number of contigs in the MAG; N50 of the MAG; Weighted mean coverage of the  
638 contigs; GC content of the MAG; GTDB-tk taxonomy string; percentage of the  
639 multiple sequence alignment (by GTDB-tk) spanned by the genome; The rest of the  
640 columns indicate the presence (1) or absence (0) of the particular AMR gene within  
641 the MAG.

642

643 **Figure S1** | Composition of the microbiota on the studied pig farms in domain,  
644 phylum, class, order and family levels.

645

646 **Figure S2** | Detailed bioinformatics pipeline workflow separated to pre-assembly,  
647 post-assembly and clade refinement. Text is coloured black for descriptions and  
648 white for the used software / script background.

649

650

651

652



653 **References**

- 654 1. Stokes HW, Gillings MR. Gene flow, mobile genetic elements and the  
655 recruitment of antibiotic resistance genes into Gram-negative pathogens. *FEMS*  
656 *microbiology reviews*. 2011;35(5):790-819. Epub 2011/04/27. doi: 10.1111/j.1574-  
657 6976.2011.00273.x. PubMed PMID: 21517914.
- 658 2. Baharoglu Z, Garriss G, Mazel D. Multiple Pathways of Genome Plasticity  
659 Leading to Development of Antibiotic Resistance. *Antibiotics (Basel)*. 2013;2(2):288-  
660 315. Epub 2013/01/01. doi: 10.3390/antibiotics2020288. PubMed PMID: 27029305;  
661 PubMed Central PMCID: PMCPMC4790341.
- 662 3. Wright GD. The antibiotic resistome: the nexus of chemical and genetic  
663 diversity. *Nature reviews Microbiology*. 2007;5(3):175-86. Epub 2007/02/06. doi:  
664 10.1038/nrmicro1614. PubMed PMID: 17277795.
- 665 4. Faure S, Perrin-Guyomard A, Delmas JM, Chatre P, Laurentie M. Transfer of  
666 plasmid-mediated CTX-M-9 from *Salmonella enterica* serotype Virchow to  
667 *Enterobacteriaceae* in human flora-associated rats treated with cefixime. *Antimicrobial*  
668 *agents and chemotherapy*. 2010;54(1):164-9. Epub 2009/11/11. doi:  
669 10.1128/AAC.00310-09. PubMed PMID: 19901088; PubMed Central PMCID:  
670 PMC2798505.
- 671 5. Guan J, Liu S, Lin Z, Li W, Liu X, Chen D. Severe sepsis facilitates intestinal  
672 colonization by extended-spectrum-beta-lactamase-producing *Klebsiella pneumoniae*  
673 and transfer of the SHV-18 resistance gene to *Escherichia coli* during antimicrobial  
674 treatment. *Antimicrobial agents and chemotherapy*. 2014;58(2):1039-46. Epub  
675 2013/11/28. doi: 10.1128/AAC.01632-13. PubMed PMID: 24277046; PubMed Central  
676 PMCID: PMC3910833.

- 677 6. Dheilly A, Le Devendec L, Mourand G, Boudier A, Jouy E, Kempf I. Resistance  
678 gene transfer during treatments for experimental avian colibacillosis. *Antimicrobial*  
679 *agents and chemotherapy*. 2012;56(1):189-96. Epub 2011/10/12. doi:  
680 10.1128/AAC.05617-11. PubMed PMID: 21986830; PubMed Central PMCID:  
681 PMC3256041.
- 682 7. Doi Y, Adams-Haduch JM, Peleg AY, D'Agata EM. The role of horizontal gene  
683 transfer in the dissemination of extended-spectrum beta-lactamase-producing  
684 *Escherichia coli* and *Klebsiella pneumoniae* isolates in an endemic setting. *Diagnostic*  
685 *microbiology and infectious disease*. 2012;74(1):34-8. Epub 2012/06/23. doi:  
686 10.1016/j.diagmicrobio.2012.05.020. PubMed PMID: 22722012; PubMed Central  
687 PMCID: PMC3427399.
- 688 8. Stecher B, Denzler R, Maier L, Bernet F, Sanders MJ, Pickard DJ, et al. Gut  
689 inflammation can boost horizontal gene transfer between pathogenic and commensal  
690 *Enterobacteriaceae*. *Proceedings of the National Academy of Sciences of the United*  
691 *States of America*. 2012;109(4):1269-74. Epub 2012/01/11. doi:  
692 10.1073/pnas.1113246109. PubMed PMID: 22232693; PubMed Central PMCID:  
693 PMC3268327.
- 694 9. Allen HK, Looft T, Bayles DO, Humphrey S, Levine UY, Alt D, et al. Antibiotics  
695 in feed induce prophages in swine fecal microbiomes. *mBio*. 2011;2(6). Epub  
696 2011/12/01. doi: 10.1128/mBio.00260-11. PubMed PMID: 22128350; PubMed Central  
697 PMCID: PMC3225969.
- 698 10. Beitel CW, Froenicke L, Lang JM, Korf IF, Michelmore RW, Eisen JA, et al.  
699 Strain- and plasmid-level deconvolution of a synthetic metagenome by sequencing  
700 proximity ligation products. *PeerJ*. 2014;2:e415. Epub 2014/06/12. doi:

- 701 10.7717/peerj.415. PubMed PMID: 24918035; PubMed Central PMCID:  
702 PMC4045339.
- 703 11. Burton JN, Liachko I, Dunham MJ, Shendure J. Species-level deconvolution of  
704 metagenome assemblies with hi-C-based contact probability maps. *G3*.  
705 2014;4(7):1339-46. Epub 2014/05/24. doi: 10.1534/g3.114.011825. PubMed PMID:  
706 24855317.
- 707 12. Marbouty M, Cournac A, Flot JF, Marie-Nelly H, Mozziconacci J, Koszul R.  
708 Metagenomic chromosome conformation capture (meta3C) unveils the diversity of  
709 chromosome organization in microorganisms. *Elife*. 2014;3:e03318. Epub 2014/12/18.  
710 doi: 10.7554/eLife.03318. PubMed PMID: 25517076; PubMed Central PMCID:  
711 PMCPMC4381813.
- 712 13. Lamendella R, Domingo JW, Ghosh S, Martinson J, Oerther DB. Comparative  
713 fecal metagenomics unveils unique functional capacity of the swine gut. *BMC*  
714 *Microbiol*. 2011;11:103. Epub 2011/05/18. doi: 10.1186/1471-2180-11-103. PubMed  
715 PMID: 21575148; PubMed Central PMCID: PMCPMC3123192.
- 716 14. Looft T, Johnson TA, Allen HK, Bayles DO, Alt DP, Stedtfeld RD, et al. In-feed  
717 antibiotic effects on the swine intestinal microbiome. *Proceedings of the National*  
718 *Academy of Sciences of the United States of America*. 2012;109(5):1691-6. Epub  
719 2012/02/07. doi: 10.1073/pnas.1120238109. PubMed PMID: 22307632; PubMed  
720 Central PMCID: PMCPMC3277147.
- 721 15. Xiao Y, Kong F, Xiang Y, Zhou W, Wang J, Yang H, et al. Comparative  
722 biogeography of the gut microbiome between Jinhua and Landrace pigs. *Sci Rep*.  
723 2018;8(1):5985. Epub 2018/04/15. doi: 10.1038/s41598-018-24289-z. PubMed PMID:  
724 29654314; PubMed Central PMCID: PMCPMC5899086.

- 725 16. Gresse R, Chaucheyras Durand F, Duniere L, Blanquet-Diot S, Forano E.  
726 Microbiota Composition and Functional Profiling Throughout the Gastrointestinal Tract  
727 of Commercial Weaning Piglets. *Microorganisms*. 2019;7(9). Epub 2019/09/25. doi:  
728 10.3390/microorganisms7090343. PubMed PMID: 31547478; PubMed Central  
729 PMCID: PMCPMC6780805.
- 730 17. Le Sciellour M, Renaudeau D, Zemb O. Longitudinal Analysis of the Microbiota  
731 Composition and Enterotypes of Pigs from Post-Weaning to Finishing.  
732 *Microorganisms*. 2019;7(12). Epub 2019/12/05. doi:  
733 10.3390/microorganisms7120622. PubMed PMID: 31795103.
- 734 18. Baudry L, Foutel-Rodier T, Thierry A, Koszul R, Marbouty M. MetaTOR: A  
735 Computational Pipeline to Recover High-Quality Metagenomic Bins From Mammalian  
736 Gut Proximity-Ligation (meta3C) Libraries. *Front Genet*. 2019;10:753. Epub  
737 2019/09/05. doi: 10.3389/fgene.2019.00753. PubMed PMID: 31481973; PubMed  
738 Central PMCID: PMCPMC6710406.
- 739 19. Bickhart DM, Watson M, Koren S, Panke-Buisse K, Cersosimo LM, Press MO,  
740 et al. Assignment of virus and antimicrobial resistance genes to microbial hosts in a  
741 complex microbial community by combined long-read assembly and proximity ligation.  
742 *Genome Biol*. 2019;20(1):153. Epub 2019/08/04. doi: 10.1186/s13059-019-1760-x.  
743 PubMed PMID: 31375138; PubMed Central PMCID: PMCPMC6676630.
- 744 20. Kent AG, Vill AC, Shi Q, Satlin MJ, Brito IL. Widespread transfer of mobile  
745 antibiotic resistance genes within individual gut microbiomes revealed through  
746 bacterial Hi-C. *Nat Commun*. 2020;11(1):4379. Epub 2020/09/03. doi:  
747 10.1038/s41467-020-18164-7. PubMed PMID: 32873785; PubMed Central PMCID:  
748 PMCPMC7463002.

- 749 21. Yaffe E, Relman DA. Tracking microbial evolution in the human gut using Hi-C  
750 reveals extensive horizontal gene transfer, persistence and adaptation. *Nat Microbiol.*  
751 2020;5(2):343-53. Epub 2019/12/25. doi: 10.1038/s41564-019-0625-0. PubMed  
752 PMID: 31873203; PubMed Central PMCID: PMC6992475.
- 753 22. Marbouty M, Baudry L, Cournac A, Koszul R. Scaffolding bacterial genomes  
754 and probing host-virus interactions in gut microbiome by proximity ligation  
755 (chromosome capture) assay. *Sci Adv.* 2017;3(2):e1602105. Epub 2017/02/25. doi:  
756 10.1126/sciadv.1602105. PubMed PMID: 28232956; PubMed Central PMCID:  
757 PMC65315449.
- 758 23. Stalder T, Press MO, Sullivan S, Liachko I, Top EM. Linking the resistome and  
759 plasmidome to the microbiome. *ISME J.* 2019;13(10):2437-46. Epub 2019/05/31. doi:  
760 10.1038/s41396-019-0446-4. PubMed PMID: 31147603; PubMed Central PMCID:  
761 PMC6776055.
- 762 24. Cameron A, McAllister TA. Antimicrobial usage and resistance in beef  
763 production. *J Anim Sci Biotechnol.* 2016;7:68. Epub 2016/12/22. doi: 10.1186/s40104-  
764 016-0127-3. PubMed PMID: 27999667; PubMed Central PMCID: PMC5154118.
- 765 25. Schmidt VM, Pinchbeck G, McIntyre KM, Nuttall T, McEwan N, Dawson S, et  
766 al. Routine antibiotic therapy in dogs increases the detection of antimicrobial-resistant  
767 faecal *Escherichia coli*. *J Antimicrob Chemother.* 2018;73(12):3305-16. Epub  
768 2018/09/15. doi: 10.1093/jac/dky352. PubMed PMID: 30215725.
- 769 26. Chaumeil PA, Mussig AJ, Hugenholtz P, Parks DH. GTDB-Tk: a toolkit to  
770 classify genomes with the Genome Taxonomy Database. *Bioinformatics.* 2019. Epub  
771 2019/11/16. doi: 10.1093/bioinformatics/btz848. PubMed PMID: 31730192.
- 772 27. Ikeda S, Kaneko T, Okubo T, Rallos LE, Eda S, Mitsui H, et al. Development of  
773 a bacterial cell enrichment method and its application to the community analysis in

- 774 soybean stems. *Microb Ecol.* 2009;58(4):703-14. Epub 2009/08/08. doi:  
775 10.1007/s00248-009-9566-0. PubMed PMID: 19662454.
- 776 28. van Berkum NL, Lieberman-Aiden E, Williams L, Imakaev M, Gnirke A, Mirny  
777 LA, et al. Hi-C: a method to study the three-dimensional architecture of genomes.  
778 *Journal of visualized experiments : JoVE.* 2010;(39). Epub 2010/05/13. doi:  
779 10.3791/1869. PubMed PMID: 20461051; PubMed Central PMCID: PMC3149993.
- 780 29. Langmead B, Salzberg SL. Fast gapped-read alignment with Bowtie 2. *Nature*  
781 *methods.* 2012;9(4):357-9. Epub 2012/03/06. doi: 10.1038/nmeth.1923. PubMed  
782 PMID: 22388286; PubMed Central PMCID: PMC3322381.
- 783 30. Magoc T, Salzberg SL. FLASH: fast length adjustment of short reads to improve  
784 genome assemblies. *Bioinformatics.* 2011;27(21):2957-63. Epub 2011/09/10. doi:  
785 10.1093/bioinformatics/btr507. PubMed PMID: 21903629; PubMed Central PMCID:  
786 PMCPMC3198573.
- 787 31. Nurk S, Meleshko D, Korobeynikov A, Pevzner PA. metaSPAdes: a new  
788 versatile metagenomic assembler. *Genome Res.* 2017;27(5):824-34. Epub  
789 2017/03/17. doi: 10.1101/gr.213959.116. PubMed PMID: 28298430; PubMed Central  
790 PMCID: PMCPMC5411777.
- 791 32. Camacho C, Coulouris G, Avagyan V, Ma N, Papadopoulos J, Bealer K, et al.  
792 BLAST+: architecture and applications. *BMC bioinformatics.* 2009;10:421. Epub  
793 2009/12/17. doi: 10.1186/1471-2105-10-421. PubMed PMID: 20003500; PubMed  
794 Central PMCID: PMC2803857.
- 795 33. Zankari E, Hasman H, Cosentino S, Vestergaard M, Rasmussen S, Lund O, et  
796 al. Identification of acquired antimicrobial resistance genes. *J Antimicrob Chemother.*  
797 2012;67(11):2640-4. Epub 2012/07/12. doi: 10.1093/jac/dks261. PubMed PMID:  
798 22782487; PubMed Central PMCID: PMC3468078.

- 799 34. Hunt M, Mather AE, Sanchez-Buso L, Page AJ, Parkhill J, Keane JA, et al.  
800 ARIBA: rapid antimicrobial resistance genotyping directly from sequencing reads.  
801 Microb Genom. 2017;3(10):e000131. Epub 2017/11/28. doi: 10.1099/mgen.0.000131.  
802 PubMed PMID: 29177089; PubMed Central PMCID: PMC65695208.
- 803 35. Ondov BD, Starrett GJ, Sappington A, Kostic A, Koren S, Buck CB, et al. Mash  
804 Screen: high-throughput sequence containment estimation for genome discovery.  
805 Genome Biol. 2019;20(1):232. Epub 2019/11/07. doi: 10.1186/s13059-019-1841-x.  
806 PubMed PMID: 31690338; PubMed Central PMCID: PMC6833257.
- 807 36. Ondov BD, Treangen TJ, Melsted P, Mallonee AB, Bergman NH, Koren S, et  
808 al. Mash: fast genome and metagenome distance estimation using MinHash. Genome  
809 Biol. 2016;17(1):132. Epub 2016/06/22. doi: 10.1186/s13059-016-0997-x. PubMed  
810 PMID: 27323842; PubMed Central PMCID: PMC4915045.
- 811 37. Letunic I, Bork P. Interactive Tree Of Life (iTOL) v4: recent updates and new  
812 developments. Nucleic Acids Res. 2019;47(W1):W256-W9. Epub 2019/04/02. doi:  
813 10.1093/nar/gkz239. PubMed PMID: 30931475; PubMed Central PMCID:  
814 PMC6602468.
- 815 38. Uritskiy GV, DiRuggiero J, Taylor J. MetaWRAP-a flexible pipeline for genome-  
816 resolved metagenomic data analysis. Microbiome. 2018;6(1):158. Epub 2018/09/17.  
817 doi: 10.1186/s40168-018-0541-1. PubMed PMID: 30219103; PubMed Central PMCID:  
818 PMC6138922.
- 819

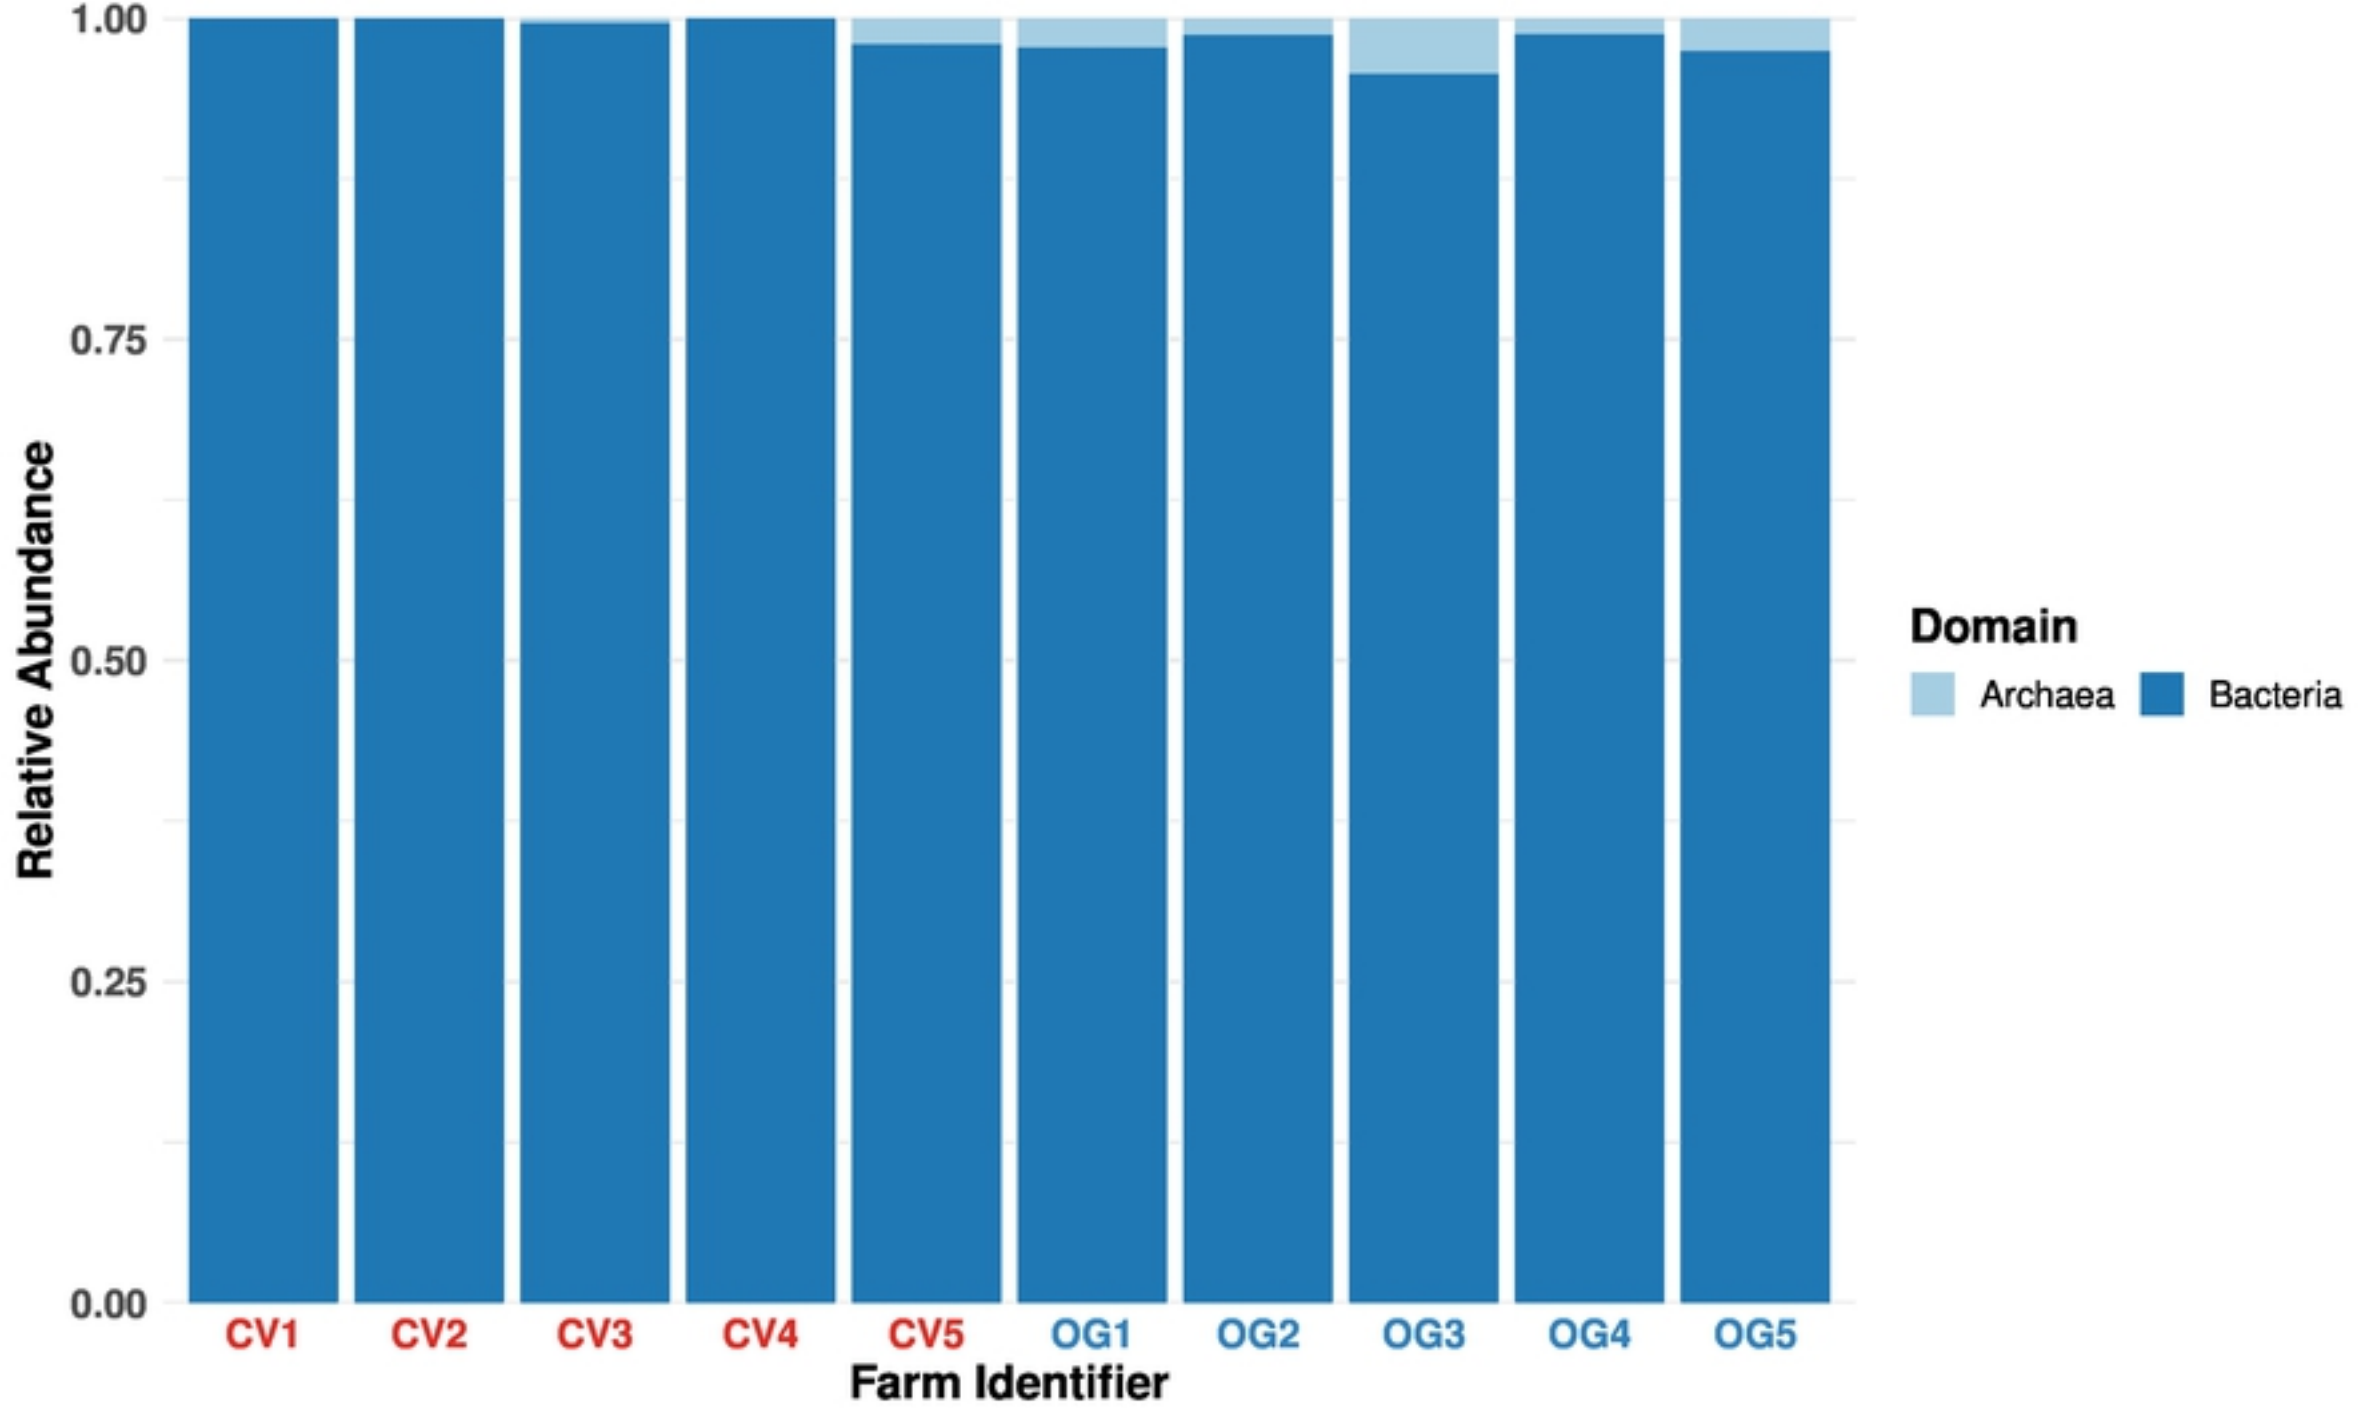



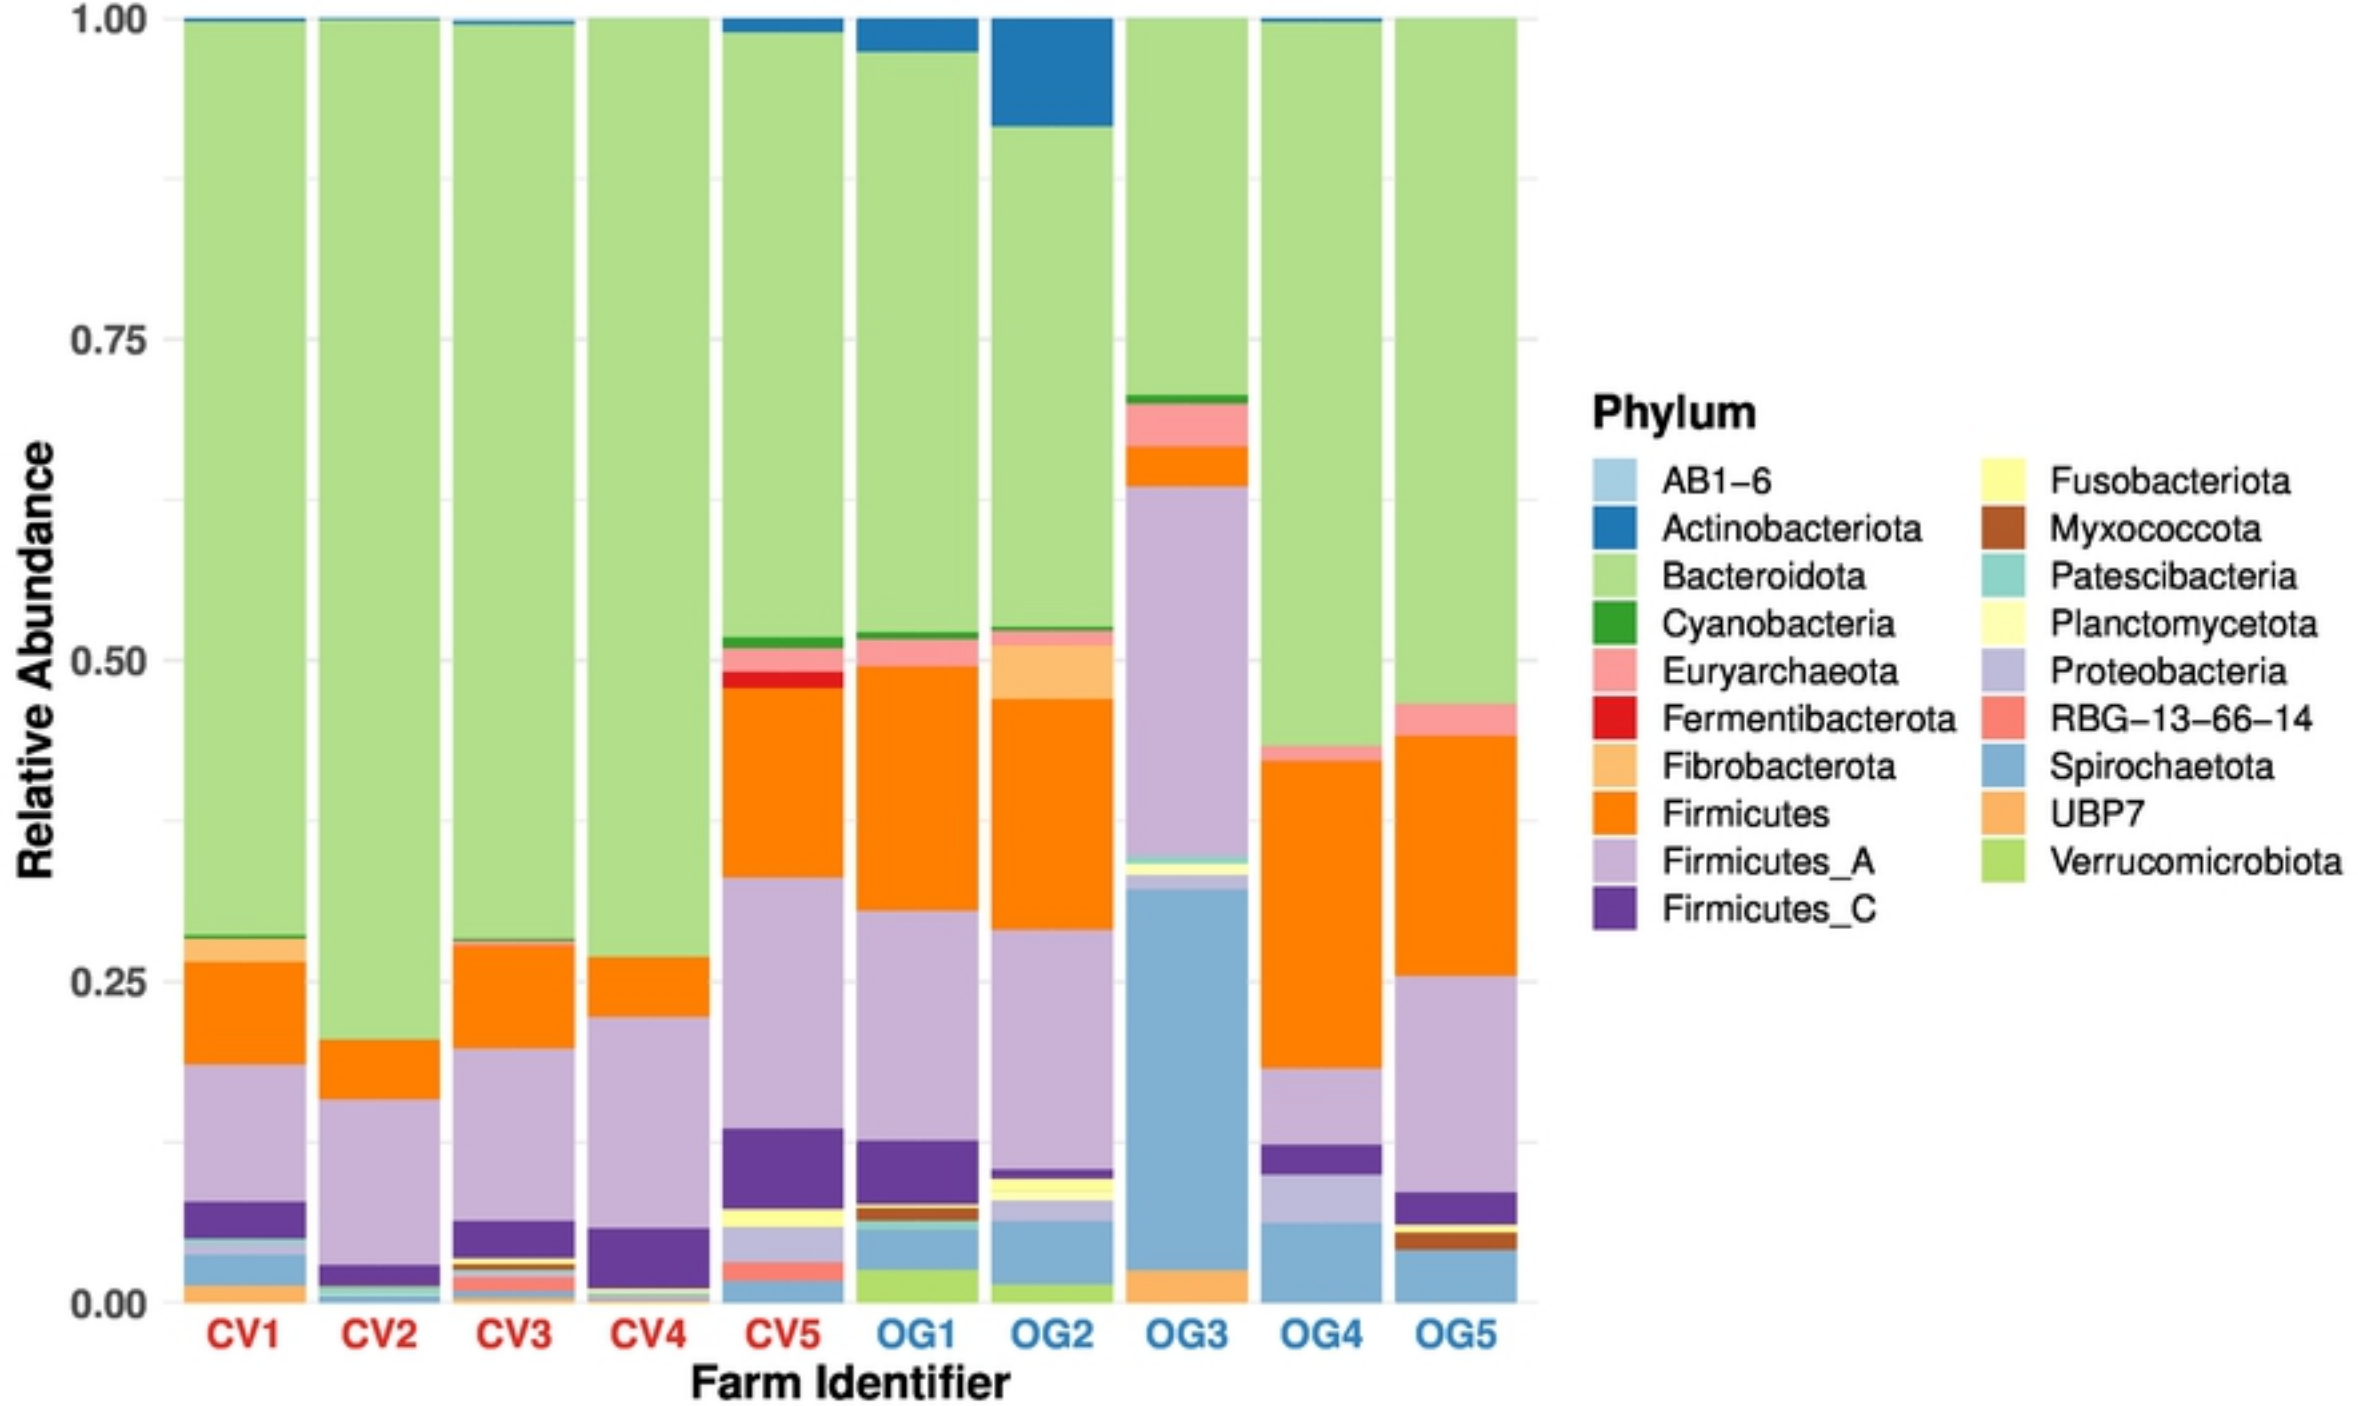

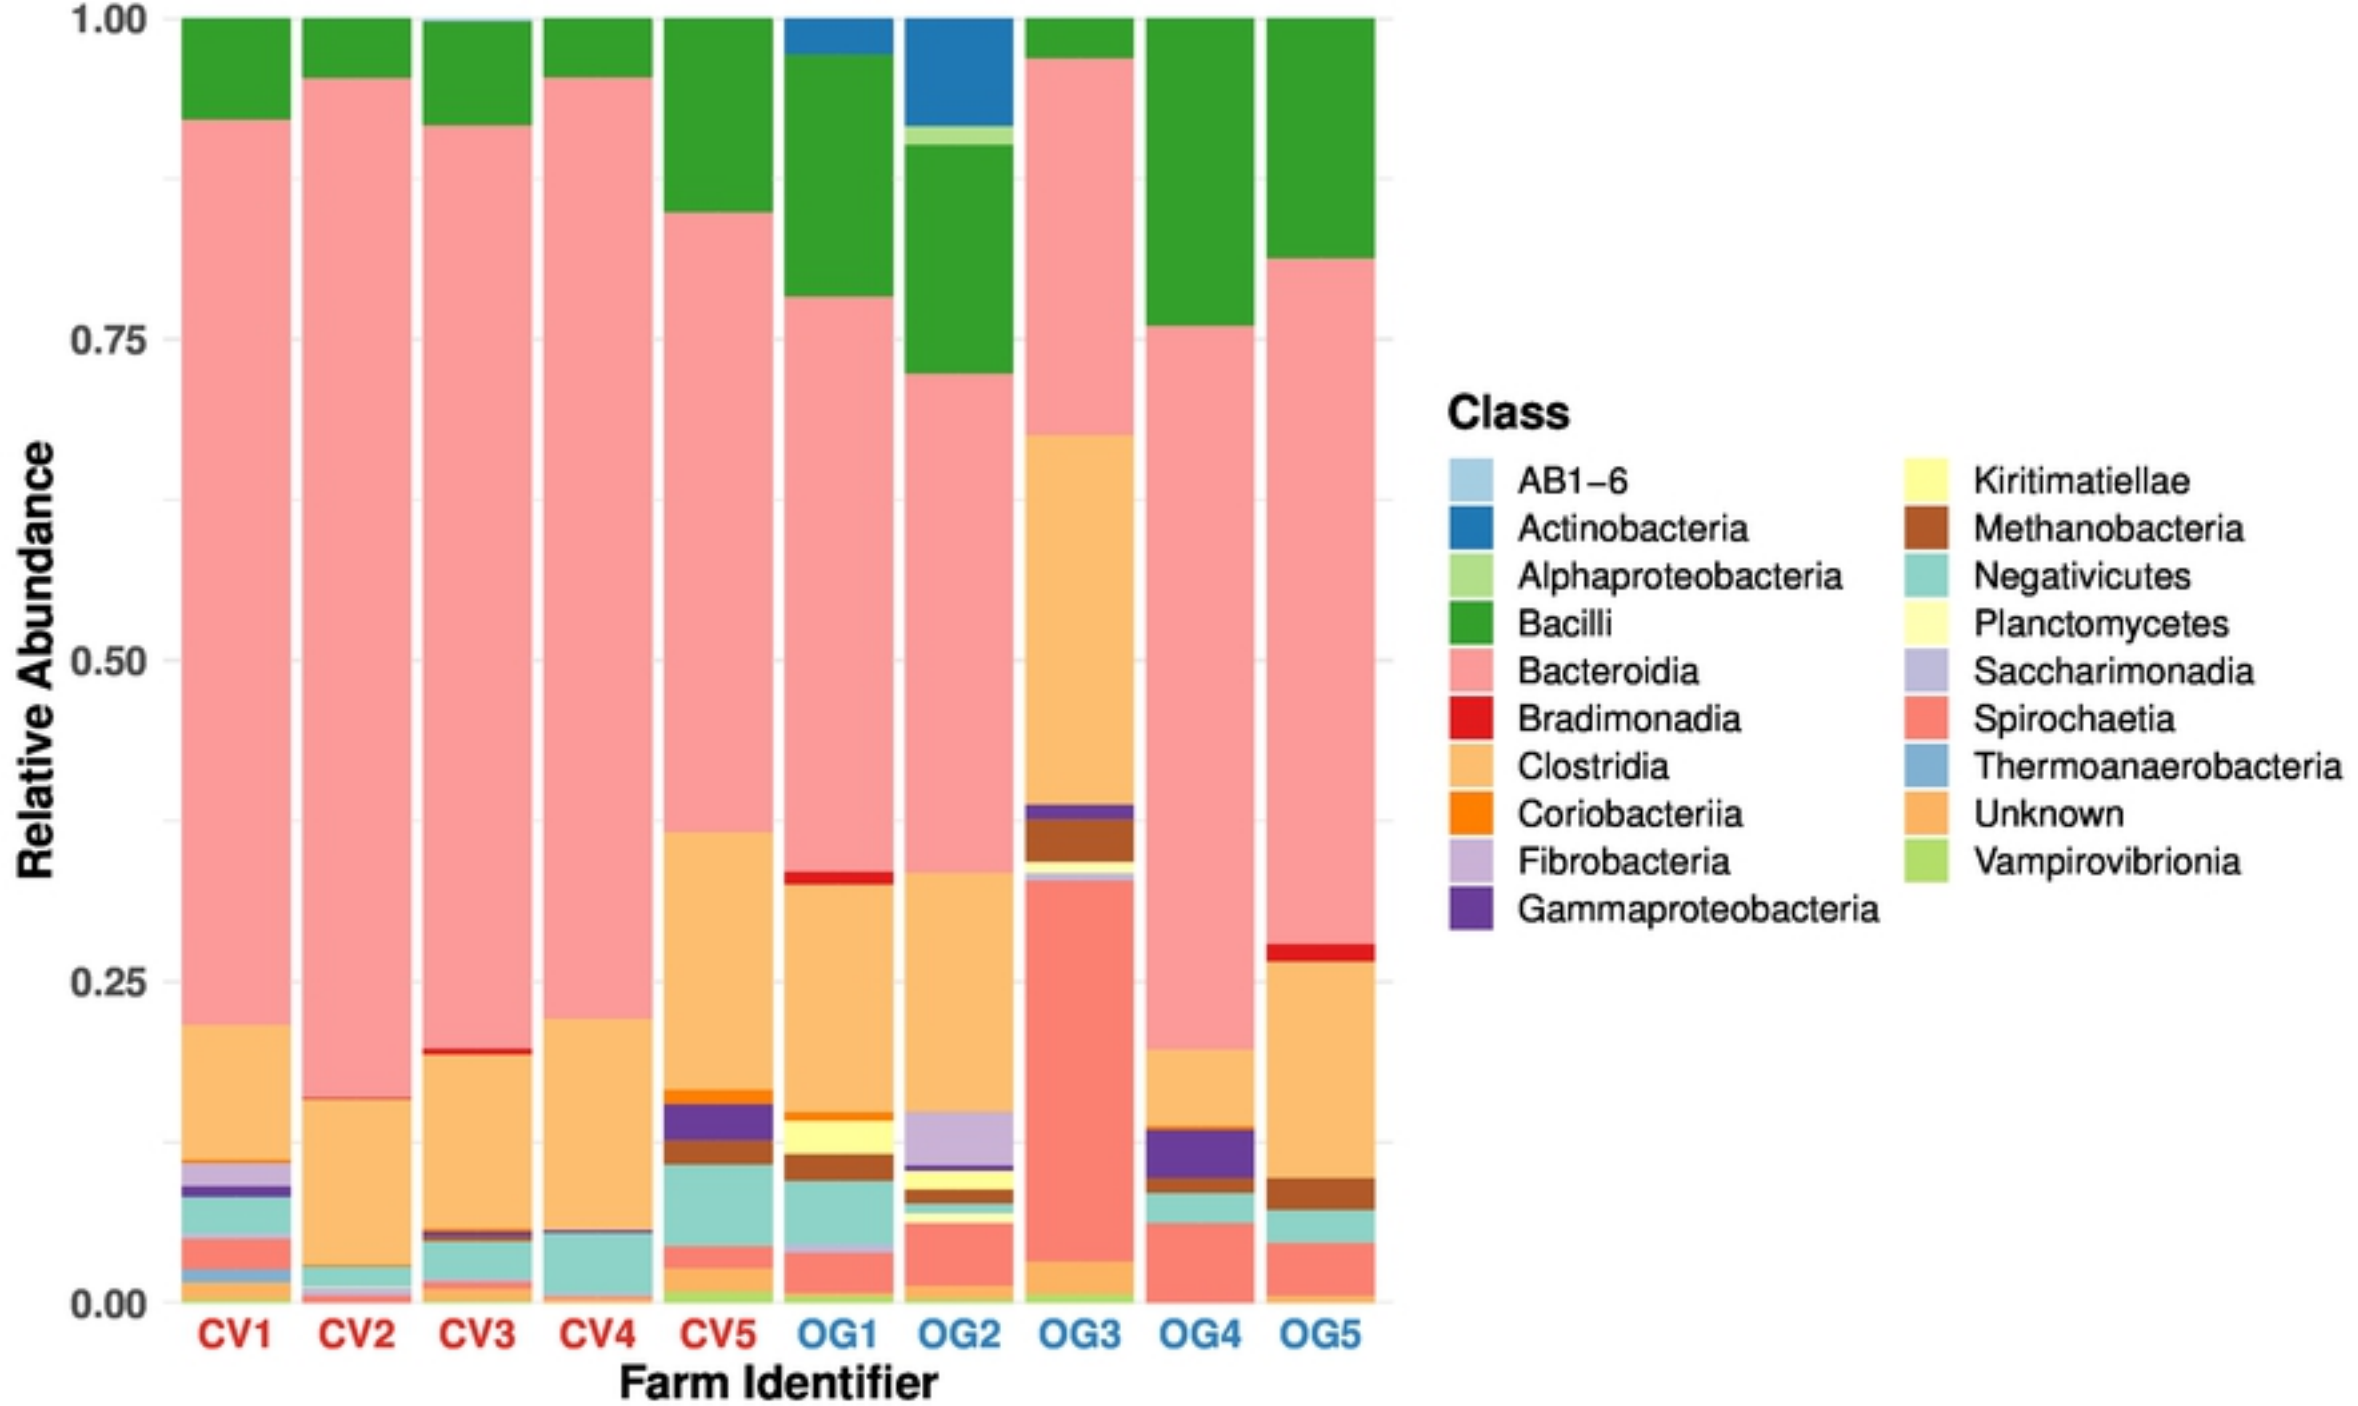

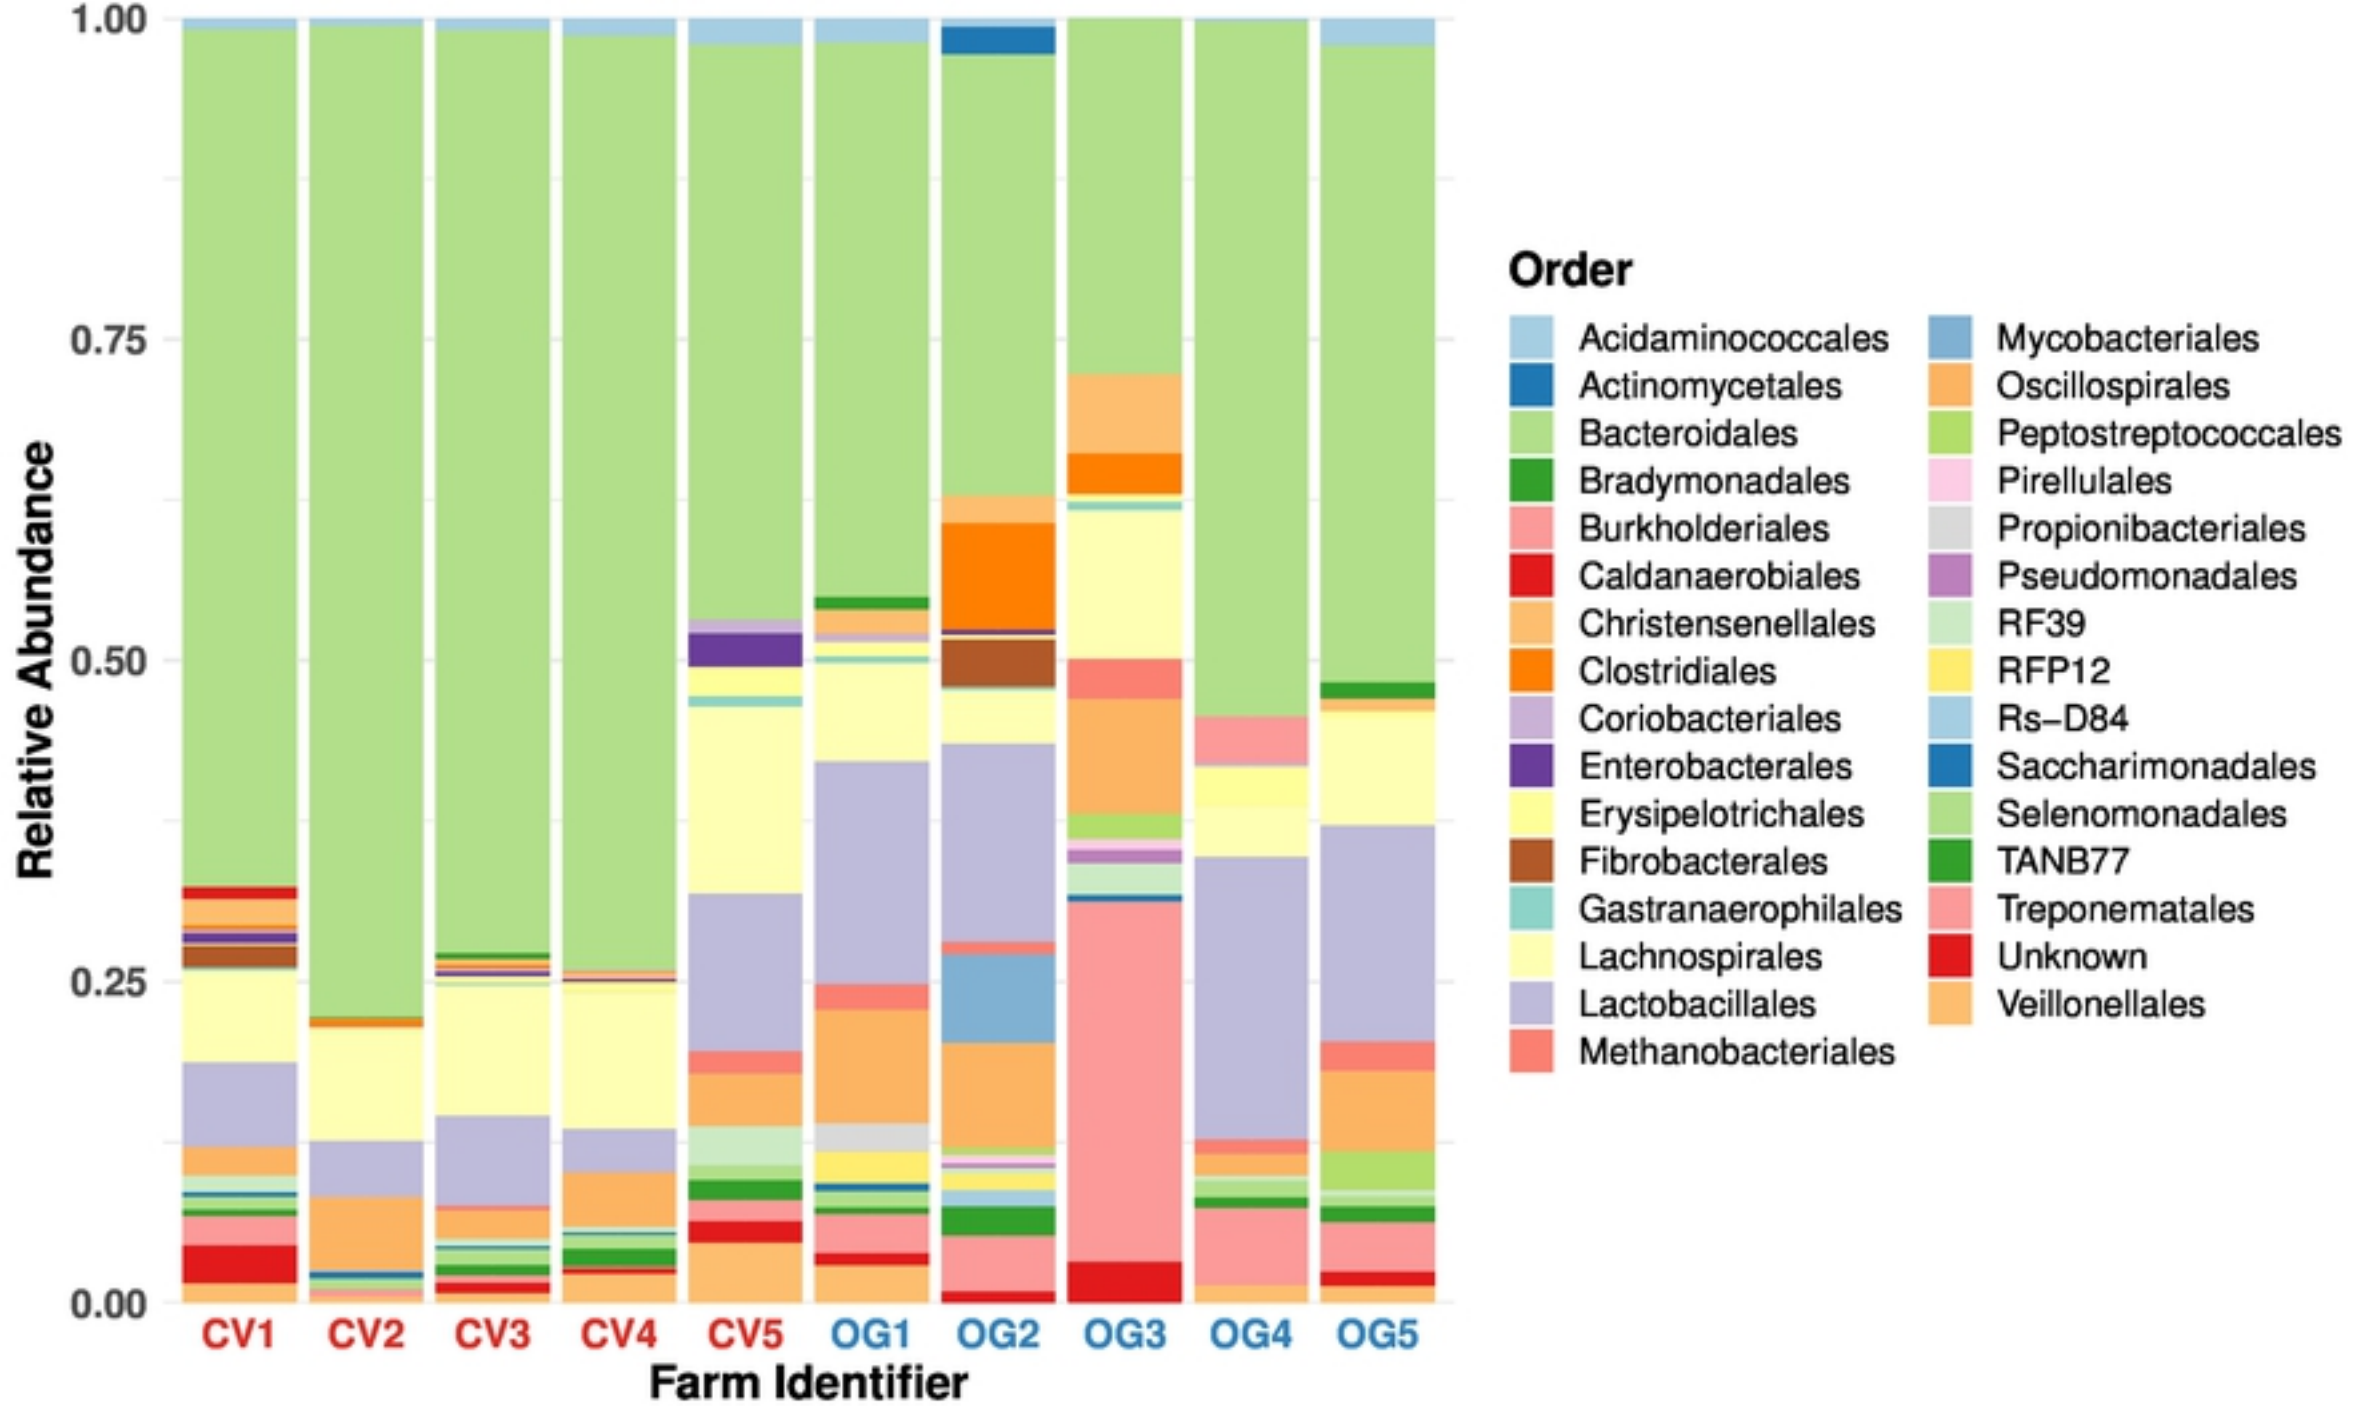

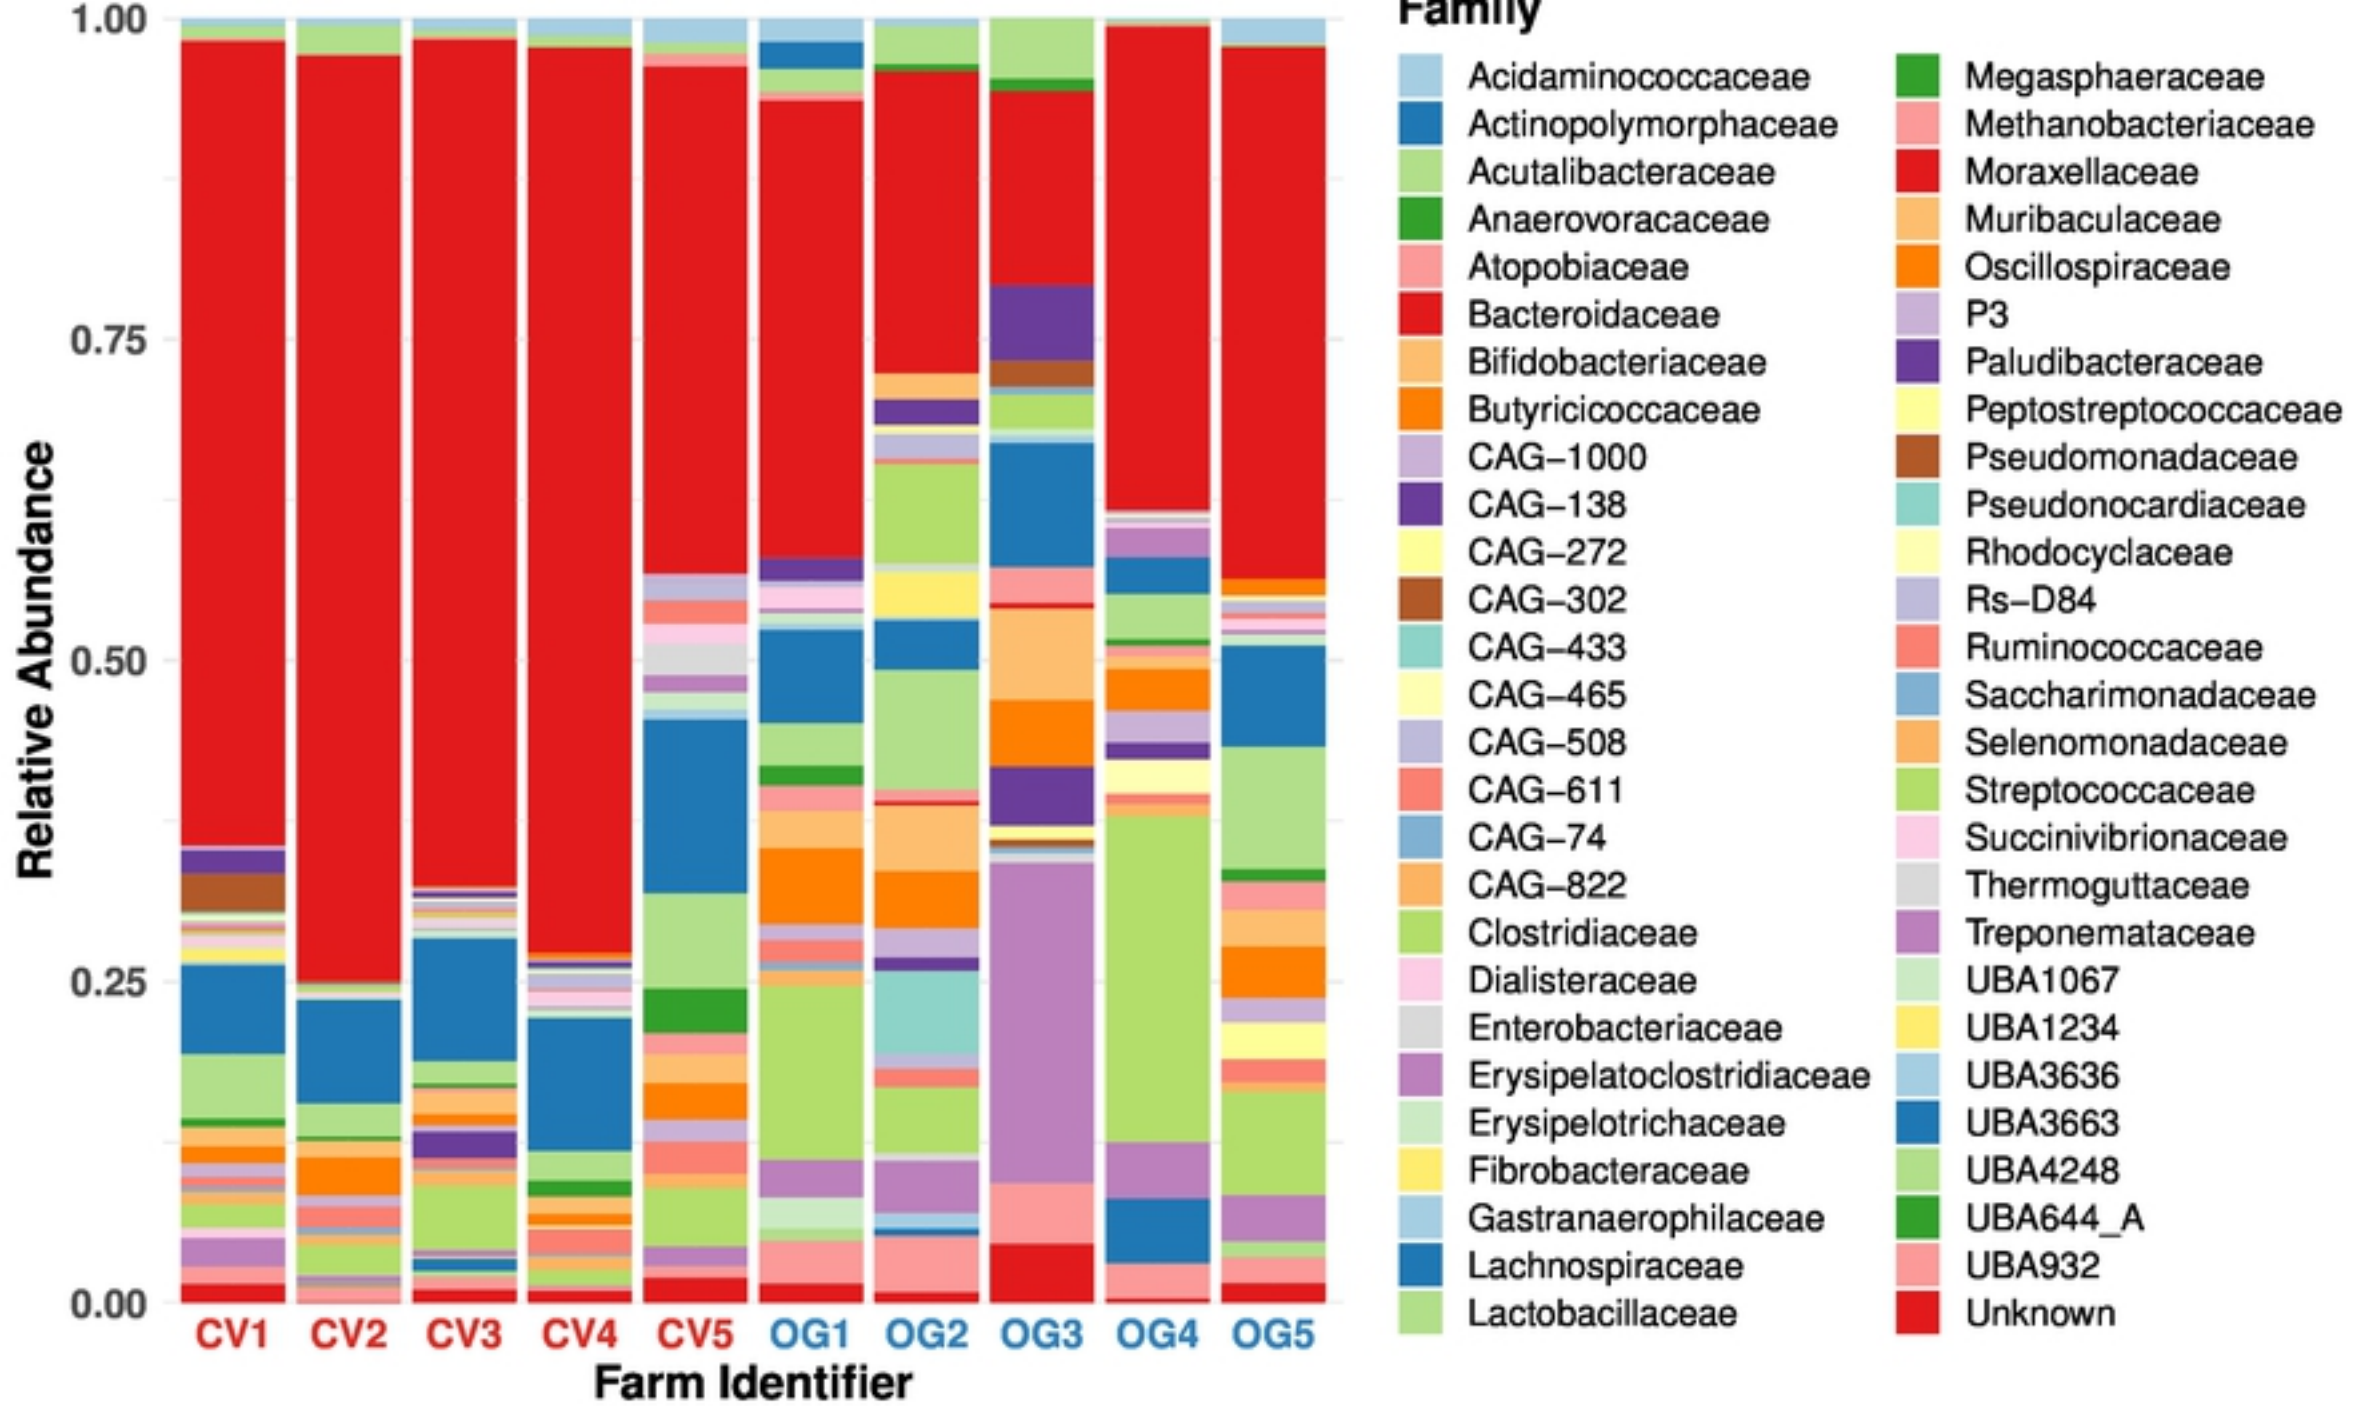



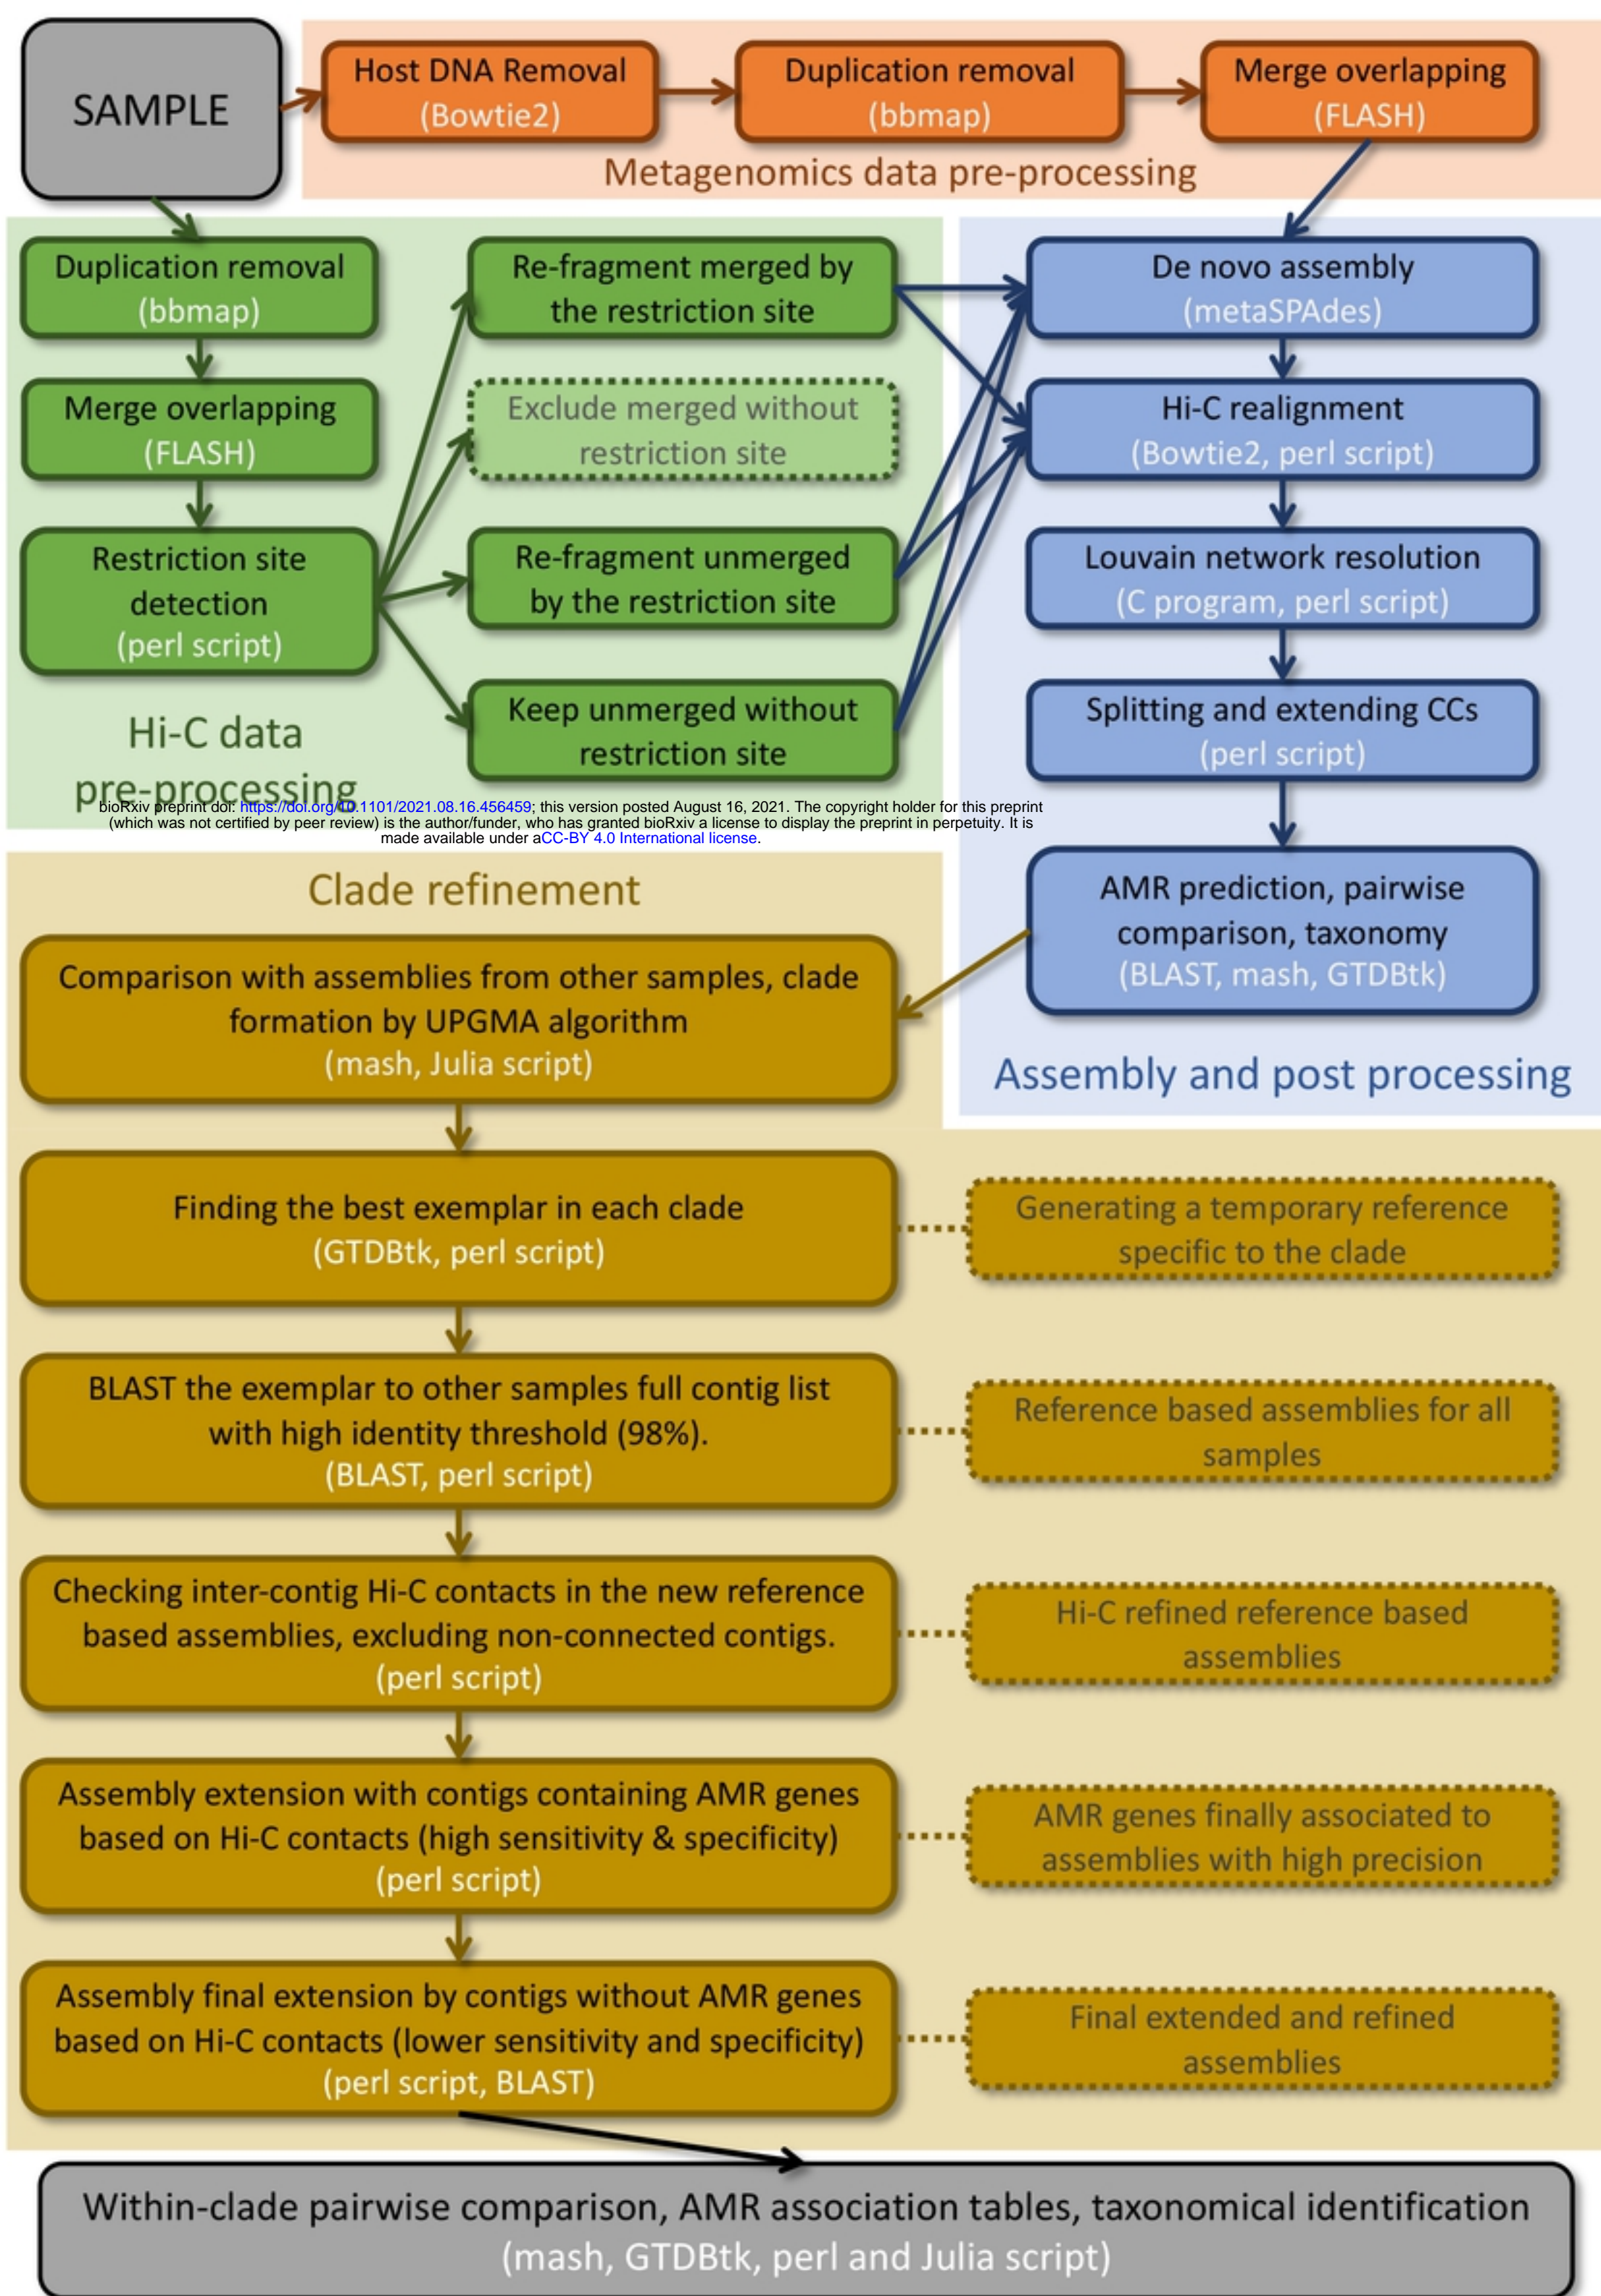

Supplementary figure 2

**Supplementary Table S1.** Characteristics of the farms used in the study. The conventional or high-antibiotic use farms are labelled CV\_1 to 5 and the organic, or low antibiotic use farms are labelled OG\_1 to 5

| <b>Farm ID</b> | <b>Location</b> | <b>Farm type</b> | <b>Total pigs</b> | <b>Date of sampling</b> |
|----------------|-----------------|------------------|-------------------|-------------------------|
| CV_1           | Suffolk         | Finishing farm   | 1300              | 02/02/2017              |
| CV_2           | Norfolk         | Finishing farm   | 1000              | 09/02/2017              |
| CV_3           | Norfolk         | Finishing farm   | 1700              | 16/02/2017              |
| CV_4           | Suffolk         | Finishing farm   | 1990              | 16/02/2017              |
| CV_5           | Suffolk         | Farrow to finish | 1000              | 17/03/2017              |
| OG_1           | Buckinghamshire | Farrow to finish | 564               | 26/01/2017              |
| OG_2           | Sussex          | Farrow to finish | 808               | 21/02/2017              |
| OG_3           | Hampshire       | Farrow to finish | 604               | 21/02/2017              |
| OG_4           | Wiltshire       | Farrow to finish | 1266              | 27/02/2017              |
| OG_5           | Gloucestershire | Farrow to finish | 700               | 27/02/2017              |

bioRxiv preprint doi: <https://doi.org/10.1101/2021.08.16.456459>; this version posted August 16, 2021. The copyright holder for this preprint (which was not certified by peer review) is the author/funder, who has granted bioRxiv a license to display the preprint in perpetuity. It is made available under aCC-BY 4.0 International license.
